# Supplementary material for: Electronic spectra of ions of astrochemical interest: from fast overview spectra to high resolution
Source: Royal Society of Chemistry journal article supplement (doi:10.1039/c8fd00196k), 2018-12-12
Supplement: c8fd00196k1.pdf [file c8fd00196k1.pdf]

## ELECTRONIC SUPPORTING INFORMATION

for

### Electronic spectra of ions of astrochemical interest: From fast overview spectra to high resolution

Jana Roithová,<sup>\*a</sup> Juraj Jašík,<sup>b</sup> Jesus J. Del Pozo<sup>a</sup> and Dieter Gerlich<sup>c</sup>

<sup>a.</sup> *Institute for Molecules and Materials, Radboud University, Heyendaalseweg 135, 6525 AJ Nijmegen, Netherlands.*

<sup>b.</sup> *Department of Organic Chemistry, Faculty of Science, Charles University, Hlavova 2030/8, 128 43 Prague 2, Czech Republic.*

<sup>c.</sup> *Department of Physics, University of Technology, 09107 Chemnitz, Germany.*

---

#### Content

|                                                                    |     |
|--------------------------------------------------------------------|-----|
| Experimental Setup, Figure S1                                      | S2  |
| Photodissociation of He-tagged ions in a w4PT, Figure S2           | S2  |
| Experimental Results                                               |     |
| Additional data for “Screening visPD spectra”<br>(Figures S3 – S5) | S6  |
| Table S1                                                           | S9  |
| UV-PD spectrum of anthracene dication (Figure S6)                  | S12 |
| Table S2 – S4                                                      | S12 |
| Figure S7                                                          | S15 |
| Theoretical Results                                                |     |
| Results of TD-DFT calculations (Table S5)                          | S16 |
| Anharmonic IR spectra (Figure S8)                                  | S17 |
| Geometries and energetics of calculated ions (Table S6)            | S18 |

---

## Experimental Setup

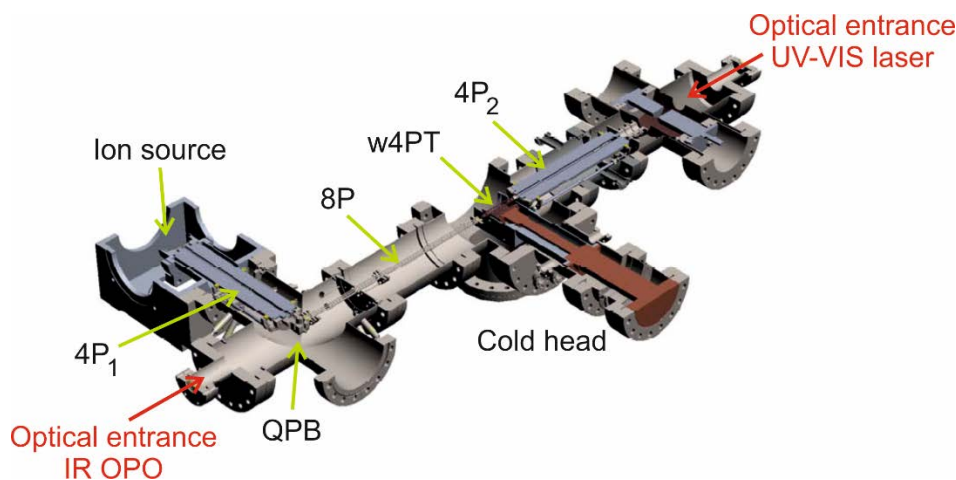

**Figure S1.** ISORI instrument. For details see: *Int. J. Mass Spectrom.* 2013, **354**, 204.

### Photodissociation of He-tagged ions in a w4PT

#### Definition of $\sigma$

The frequency dependent photoabsorption cross section,  $\sigma$ , is usually defined via attenuation of a light beam passing an absorption cell containing the absorbing molecules at a density  $n$  (see Figure S2c). If  $I_0$  is the intensity at the entrance, the intensity at the exit,  $I$ , is given by the Beer–Lambert law,

$$I = I_0 \exp(-\sigma n l). \quad (\text{S1})$$

The intensity decays exponentially as a function of the product of the absorption cross section  $\sigma$ , the density  $n$  and the cell length  $l$ . The sensitivity of direct absorption techniques is primarily limited by intensity fluctuations of the light source requiring a relative intensity change of at least 0.001. The attenuation of light passing a trapped ion cloud is below  $5 \times 10^{-10}$ , assuming a cross section of  $1 \text{ \AA}^2$  and a column density of  $n l \sim 5 \times 10^6 \text{ cm}^{-2}$ . As an alternative, indirect absorption techniques have been developed that are based on monitoring an effect induced by the absorption of light ("action spectroscopy"). Such indirect techniques are many orders of magnitude more sensitive than direct absorption, but most of them do not provide directly absolute absorption cross sections.

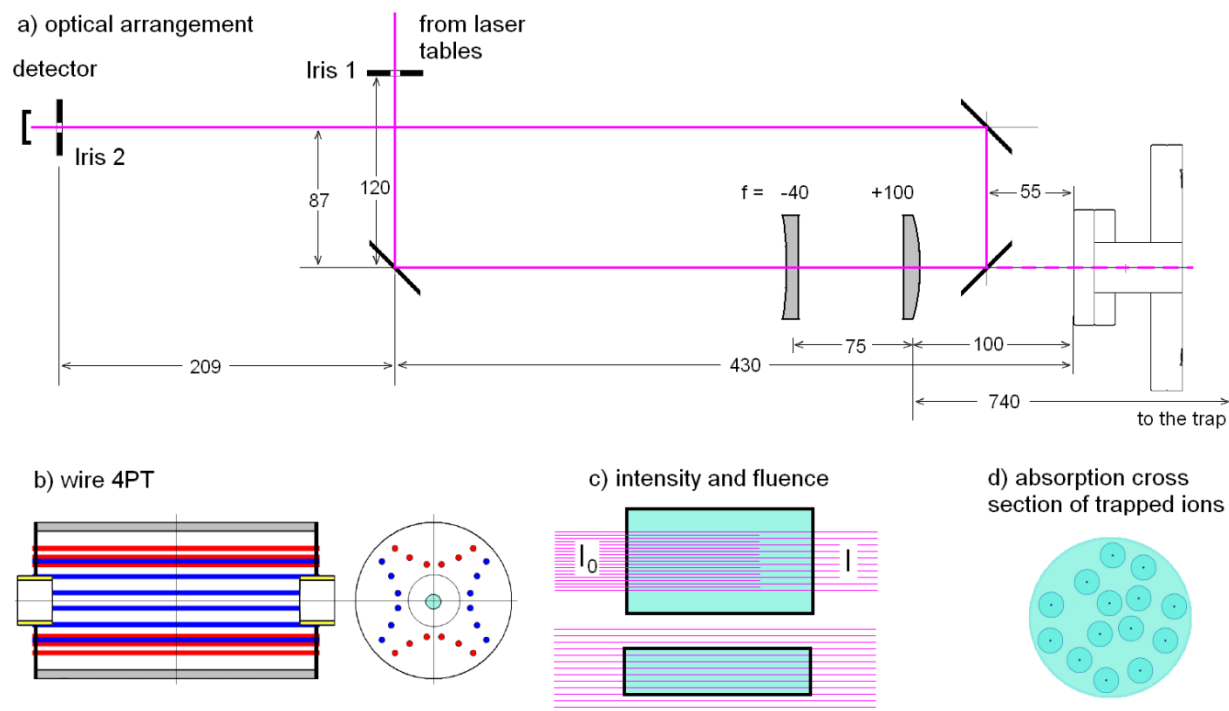

**Figure S2.** Determination of absolute photo absorption cross sections. Panel a) shows the optical arrangement to transfer the laser or OPO beam into the trap and to test the beam profile at this distance by reflecting it to the detector in the upper left corner. Panel b) shows the wire quadrupole trap that allows us to squeeze the ion cloud (blue point) into the light beam (magenta circle). The upper part of panel c) illustrates the definition of the photo absorption cross section via the Beer–Lambert law (Eq. S1) while the lower part depicts our trapping experiment, where a certain number of mass selected He-complexes is confined in a cylinder with a diameter below 1 mm and is exposed for a time interval (here up to 0.9 s) to the homogeneous flow of photons. Panel d) Simple geometrical illustration for deriving the probability to hit one of the trapped ions if one exposes them to a fluence of a certain number of photons/cm<sup>2</sup>.

Our approach, based on He-tagging in a cryogenic w4PT, is an elegant method to obtain  $\sigma$  just from counting (typically every s) the number of the trapped He-tagged ions with and without laser. To optimize the geometry, the ions are confined in a cylinder with a small diameter (see figure S2b) and exposed to a homogeneous fluence of photons,  $\Phi$ . Measuring alternatively the number of helium complexes with and without radiation, one gets

$$N(\Phi) = N_0 \exp(-\sigma \Phi). \quad (\text{S2})$$

This equation holds with the same cross section  $\sigma$  as introduced in Eq. 1, because the perturbation of the molecule by the attached He is negligible in most cases. Moreover, it is safe

to assume that, in the case of UV, vis or IR light, the absorption of a single photon always results in breaking the weak vdW bond.

The fluence  $\Phi$  is the total number of photons per  $\text{cm}^2$ , the ion cloud has been exposed to. It is determined from the laser power or from the energy per OPO pulse, the irradiation time (or the number of light pulses) and from the geometry. In the present work we determine the mean fluence at the location of the trapped ions by deflecting the laser as illustrated in Fig. S2a and by measuring the effective diameter of the beam by closing iris 2 until the light detector shows 50% of the laser power (or energy). More accurate would be to permanently monitor the actual beam profile and its geometrical stability by reflecting a fixed fraction of the light beam. We also account for reflection and transmission loss by the mirrors and windows. In the present work, fluctuations of the light sources are taken into account by recording the energy per pulse (or power) behind the exit window of the instrument.

In practice, the number of complexes,  $N(\Phi)$ , remaining after exposing them to a laser fluence  $\Phi$ , is described with the function

$$N(\Phi) = N_0 \left( (1 - \beta) e^{-\frac{\Phi}{\Phi_0}} + \beta \right), \quad (\text{S3})$$

where the parameter  $\beta$  accounts for the fraction of trapped ions with the same mass which do not absorb light at the selected wavelength. In most cases these are isomers. The characteristic fluence,  $\Phi_0$ , is determined at the central frequency of the peak,  $\nu_c$ , by varying  $\Phi$  (laser power or the irradiation time). A typical example is shown in Figure 6. Using the units  $\text{cm}^{-1}$  for  $\nu$  and  $\text{mJ}/\text{cm}^2$  for  $\Phi_0$  one gets  $\sigma$  in  $\text{cm}^2$  from

$$\sigma = \nu / (\text{conv} \Phi_0) \quad (\text{S4})$$

with the conversion factor

$$\text{conv} = 0.001/1.602 \times 10^{-19} \times 8065.73 = 5.03423 \times 10^{19} \quad (\text{S5})$$

For determining the cross section from a measured attenuation, one gets from Eqs. (S3) and (S4)

$$\sigma = -\frac{\nu}{\text{conv} \Phi} \ln \left[ \left( \frac{N(\Phi)}{N_0} - \beta \right) / (1 - \beta) \right] \quad (\text{S6})$$

As already mentioned above,  $\text{conv} \times \Phi_0 / \nu$  is the number of photons per  $\text{cm}^2$ , the ions have been exposed to. With the help of Figure S2d, a simple statistical consideration allows one to proof that  $\sigma$  is really the absorption cross section.

## *Accuracy and problems*

In principle, our method to record absolute cross sections is not only fast (measurements like the one shown in Figure 6 can be done in less than 10 min) but it is also very precise, at least in principle. In an ideal linear quadrupole, the effective potential of the quadrupole trap can squeeze the ions into a cylinder with a diameter of 0.25 mm ( $C_{14}H_{10}^{2+}$ , 1 MHz,  $V_0 = 100$  V). With the geometry shown in Fig. S2 the SuperK laser has been focused to a diameter of 0.35 mm resulting in a maximum spectral fluence of 10 mJ per  $cm^2$  and per nm. With this fluence it is easy to fully saturate many transitions as shown in this paper.

In practice, several experimental difficulties hamper obtaining precise values of absolute cross sections. The measurements depend on the geometry of all relevant optical parts (especially the pointing stability of the light sources) which have to be therefore very stable. Also, we had problems with the precise localization of the ion cloud in some of our experiments. For example, small potential perturbations of the trap electrodes can push (or pull) the ion cloud away from the geometrical center line of the trap and reduce the effective fluence. The results in Fig. 2b and 2f show measurements with the same settings of the laser; however, within 2 hours, the effective fluence has been reduced. Readjustment of the relevant parameters can usually compensate the perturbations. In the case of surface problems ("patch effects") usually the electrodes have to be cleaned. The trapping conditions can also be improved for a few hours by turning off the cold head and warming up the electrodes to 50 K. It is important to mention that space charge effects play a role if one operates with ion densities of more than  $10^6$  ions/ $cm^3$ .

Under unfavorable conditions our measured absolute cross sections could differ by up to a factor 3. Usually, for a fixed arrangement of the laser etc. the results are reproducible with a statistical error of smaller than 5%. At the moment, this can be completely neglected in comparison with the systematic errors. In the present arrangement, the determination of the effective fluence is certainly the biggest problem, typically up to 50%. Errors from the calibrated laser power meter (< 5%) can be neglected. Most problematic is the exact position and the shape of the laser profile inside the trap and its overlap with the ions cloud. For reducing these uncertainties, we have increased the distance of the two lenses (from 75 to 77 mm), shifting the focus out of the trap and increasing the diameter of the slightly divergent light beam to 1.1 mm. This results in more stable conditions; however, it reduces the fluence by a factor of 10. Finally, the relative number of ions which do not absorb ( $\beta$  in Eq. 3), can introduce an error of up to 10 %. Overall, the results presented in this paper, have an uncertainty of up to a factor 2. Improving the experiment (cleaner or other trap electrodes, better optics, e.g. a beam profiler), our method can provide absolute cross sections with an accuracy better than 10%. This is also possible with the SuperK laser. The only additional uncertainty is the actual line width of the beam prepared with the AOTF filter.

## Experimental Results

### Additional data to “Screening visPD spectra”

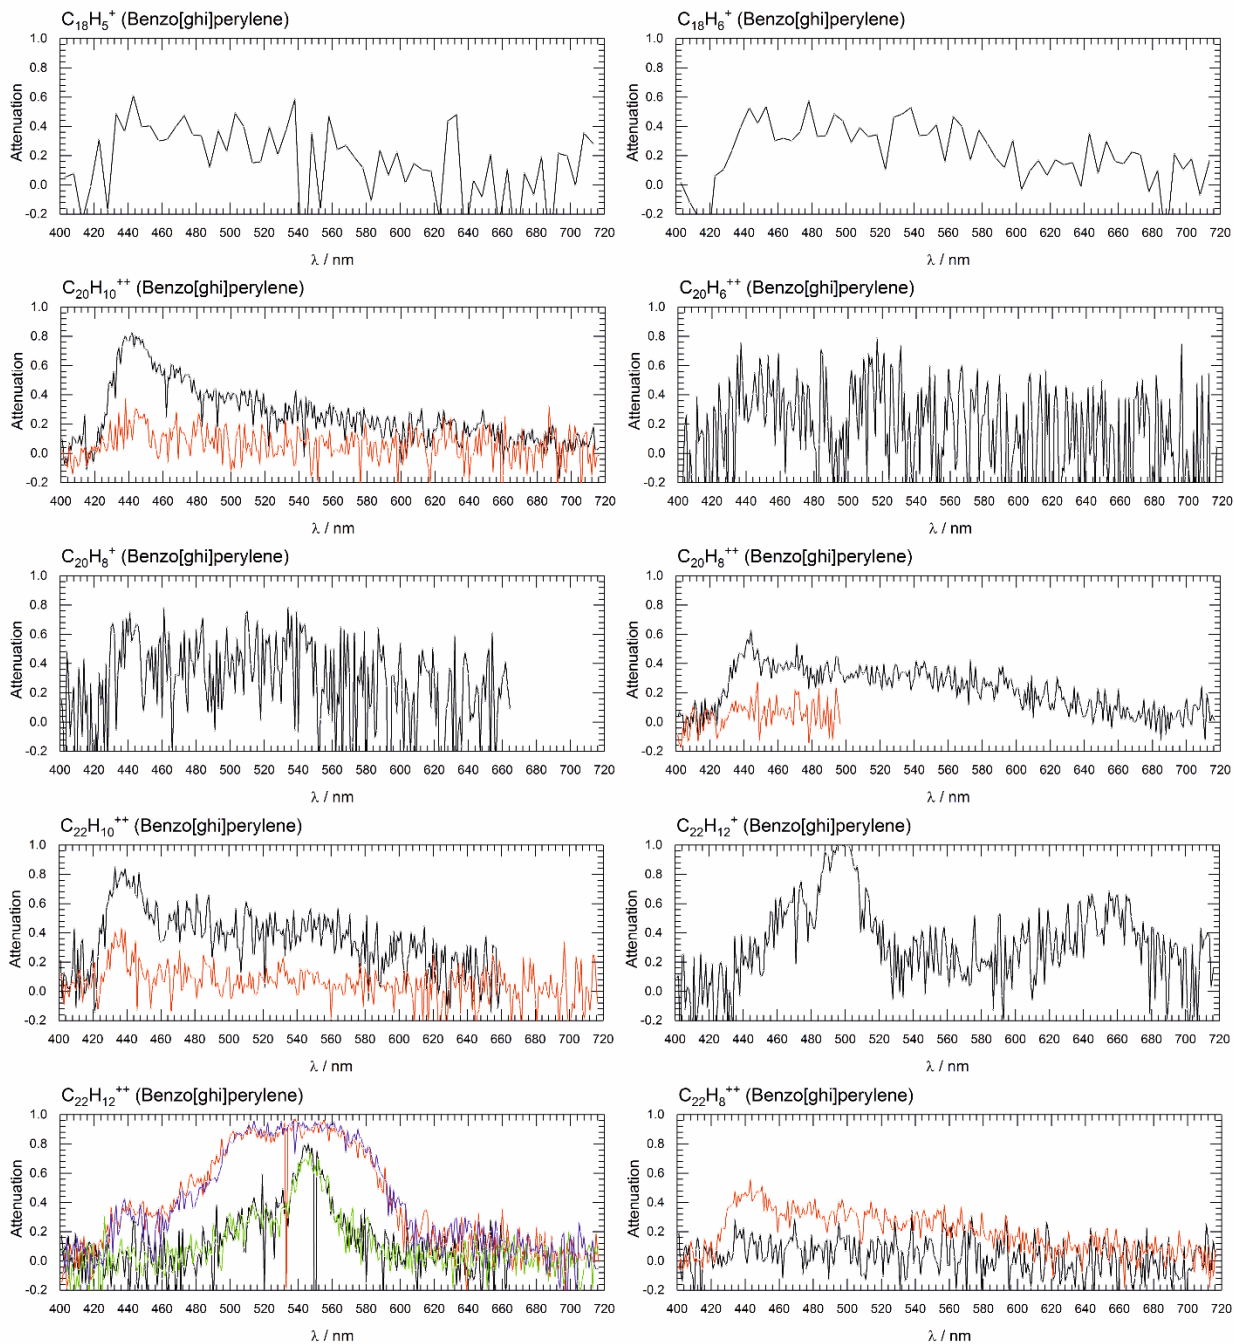

**Figure S3.** Overview photodissociation spectra of He-complexes of the indicated cations and dications generated by EI from benzo[ghi]perylene. Spectra recorded with different power levels of the SuperK laser are colour-coded.

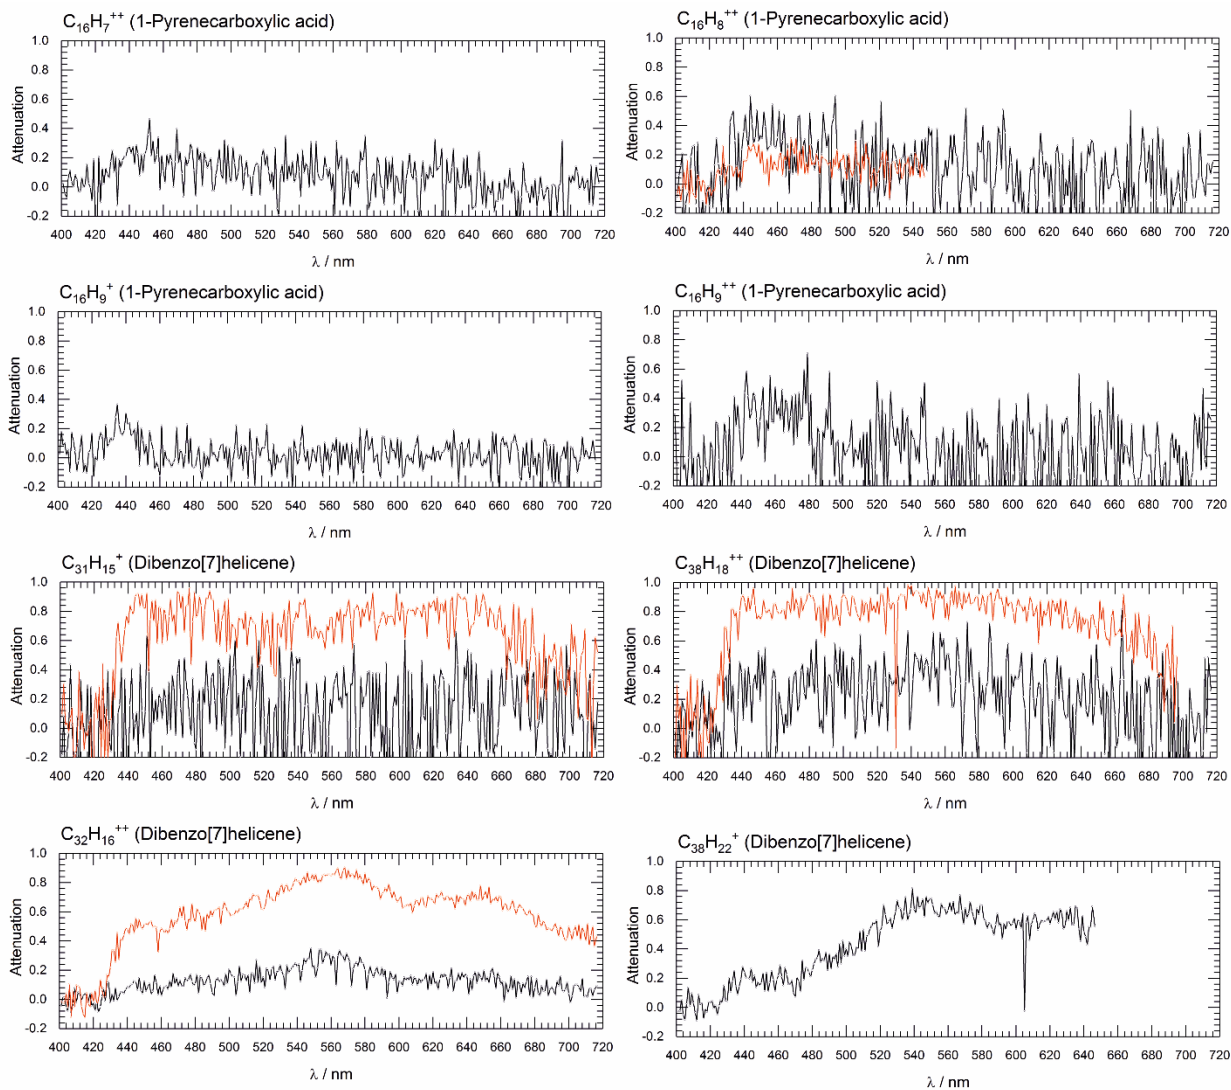

**Figure S4.** Overview photodissociation spectra of He-complexes of the indicated cations and dications generated by EI from 1-pyrenecarboxylic acid and dibenzo[7]helicene. Spectra recorded with different power levels of the SuperK laser are colour-coded.

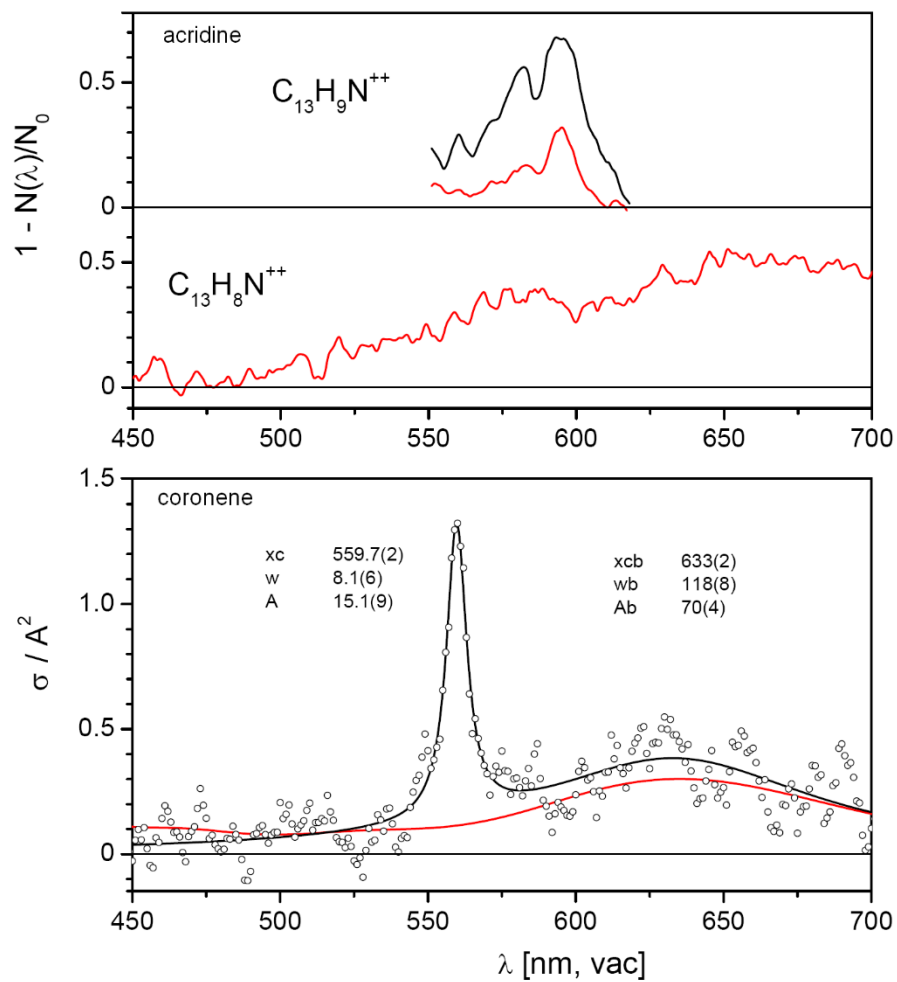

**Figure S5.** Helium tagging vis-PD spectra of  $C_{13}H_9N^{2+}$  and  $C_{13}H_8N^{2+}$  generated from acridine (upper panel) and  $C_{24}H_{12}^{2+}$  generated from coronene.



**Table S1.** List of helium tagging vis-PD spectra measured for ions generated from different aromatic hydrocarbon precursors.

| 1-Pyrenecarboxylic acid |      |                                                            |           |       |        |        |         |        |         |         |     |                      |
|-------------------------|------|------------------------------------------------------------|-----------|-------|--------|--------|---------|--------|---------|---------|-----|----------------------|
| Nr                      | m/z  | Ion                                                        | Date      | File  | PO / % | RF / % | Dt / ms | n / nm | Dn / nm | att / % | fig | Note                 |
| 1                       | 247  | $^{13}\text{C}^{12}\text{C}_{16}\text{H}_{10}\text{O}_2^+$ | 19.6.2018 | vis11 | 100    | 20     | 800     |        |         |         | 2g  |                      |
| 2                       | 246  | $\text{C}_{17}\text{H}_{10}\text{O}_2^+$                   | 19.6.2018 | vis06 | 100    | 20     | 100     | 445.0  | 21      | 62      | 2f  | P=45uW               |
| 3                       | 246  | $\text{C}_{17}\text{H}_{10}\text{O}_2^+$                   | 19.6.2018 | vis07 | 50     | 20     | 100     |        |         |         |     |                      |
| 4                       | 246  | $\text{C}_{17}\text{H}_{10}\text{O}_2^+$                   | 19.6.2018 | vis08 | 100    | 30     | 100     | 444.5  | 18      | 76      |     |                      |
| 5                       | 246  | $\text{C}_{17}\text{H}_{10}\text{O}_2^+$                   | 19.6.2018 | vis09 | 100    | 20     | 100     | 444.9  | 18      | 36      | 2f  |                      |
| 6                       | 246  | $\text{C}_{17}\text{H}_{10}\text{O}_2^+$                   | 19.6.2018 | vis10 | 100    | 20     | 800     |        |         |         | 2f  |                      |
| 7                       | 229  | $\text{C}_{17}\text{H}_9\text{O}^+$                        | 20.6.2018 | vis01 | 100    | 20     | 100     |        |         |         |     |                      |
| 8                       | 229  | $\text{C}_{17}\text{H}_9\text{O}^+$                        | 20.6.2018 | vis02 | 100    | 20     | 100     |        |         |         |     | P 100 and 50%        |
| 9                       | 229  | $\text{C}_{17}\text{H}_9\text{O}^+$                        | 19.6.2018 | vis12 | 50     | 20     | 800     |        |         |         | 2h  |                      |
| 10                      | 229  | $\text{C}_{17}\text{H}_9\text{O}^+$                        | 19.6.2018 | vis13 | 25     | 20     | 100     | 466.3  | 4       | 28      |     |                      |
| 11                      | 229  | $\text{C}_{17}\text{H}_9\text{O}^+$                        | 19.6.2018 | vis13 | 25     | 20     | 100     | 474.5  | 3       | 54      | 2h  |                      |
| 12                      | 229  | $\text{C}_{17}\text{H}_9\text{O}^+$                        | 19.6.2018 | vis14 | 50     | 20     | 100     | 466.9  | 5       | 50      |     |                      |
| 13                      | 229  | $\text{C}_{17}\text{H}_9\text{O}^+$                        | 19.6.2018 | vis14 | 50     | 20     | 100     | 474.3  | 3       | 93      |     |                      |
| 14                      | 229  | $\text{C}_{17}\text{H}_9\text{O}^+$                        | 19.6.2018 | vis15 | 50     | 20     | 100     |        |         |         | 2h  |                      |
| 15                      | 201  | $\text{C}_{16}\text{H}_9^+$                                | 19.6.2018 | vis01 | 100    | 20     | 800     | 438.0  | 20      | 23      |     |                      |
| 16                      | 101  | $\text{C}_{16}\text{H}_9^{++}$                             | 19.6.2018 | vis05 | 100    | 20     | 800     | 462.0  | 40      | 35      |     |                      |
| 17                      | 100  | $\text{C}_{16}\text{H}_8^{++}$                             | 19.6.2018 | vis02 | 100    | 20     | 800     |        |         |         |     |                      |
| 18                      | 100  | $\text{C}_{16}\text{H}_8^{++}$                             | 19.6.2018 | vis03 | 100    | 20     | 800     | 470.0  | b       | 20      |     |                      |
| 19                      | 99.5 | $\text{C}_{16}\text{H}_7^{++}$                             | 19.6.2018 | vis04 | 100    | 20     | 800     | 450.0  | b       | 20      |     |                      |
| Anthracene              |      |                                                            |           |       |        |        |         |        |         |         |     |                      |
| Nr                      | m/z  | Ion                                                        | Date      | File  | PO / % | RF / % | Dt / ms | n / nm | Dn / nm | att / % | fig | Note                 |
| 20                      | 178  | $\text{C}_{14}\text{H}_{10}^+$                             | 13.6.2018 | vis01 | 100    | 20     | 840     |        |         |         |     |                      |
| 21                      | 178  | $\text{C}_{14}\text{H}_{10}^+$                             | 13.6.2018 | vis02 | 100    | 20     | 840     |        |         |         |     |                      |
| 22                      | 178  | $\text{C}_{14}\text{H}_{10}^+$                             | 14.6.2018 | vis17 | 100    | 20     | 800     |        |         |         | 2a  |                      |
| 23                      | 178  | $\text{C}_{14}\text{H}_{10}^+$                             | 14.6.2018 | vis18 | 100    | 20     | 100     |        |         |         | 2a  |                      |
| 24                      | 176  | $\text{C}_{14}\text{H}_8^+$                                | 14.6.2018 | vis10 | 100    | 20     | 800     |        |         |         | 2c  | 580 - 640nm att 60%  |
| 25                      | 152  | $\text{C}_{12}\text{H}_8^+$                                | 14.6.2018 | vis08 | 100    | 20     | 100     |        |         |         | 2d  | no line, att=0.8±13% |
| 26                      | 152  | $\text{C}_{12}\text{H}_8^+$                                | 14.6.2018 | vis09 | 100    | 20     | 800     | 554.0  | 100     | 25      | 2d  |                      |
| 27                      | 151  | $\text{C}_{12}\text{H}_7^+$                                | 14.6.2018 | vis06 | 100    | 20     | 100     |        |         |         |     | no line att=-2±6.7%  |
| 28                      | 150  | $\text{C}_{12}\text{H}_6^+$                                | 14.6.2018 | vis07 | 100    | 20     | 100     |        |         |         |     | no line, att=-0.3±8% |
| 29                      | 101  | $\text{C}_8\text{H}_5^+$                                   | 14.6.2018 | vis14 | 100    | 20     | 800     |        |         |         |     | no line, att=-5±31%  |

|                           |            |                                               |             |             |               |               |                |               |                |                |            |             |                                             |
|---------------------------|------------|-----------------------------------------------|-------------|-------------|---------------|---------------|----------------|---------------|----------------|----------------|------------|-------------|---------------------------------------------|
| 30                        | 100        | C <sub>8</sub> H <sub>4</sub> <sup>+</sup>    | 14.6.2018   | -           | -             | -             | -              |               |                |                |            |             | no He complexes                             |
| 31                        | 99         | C <sub>8</sub> H <sub>3</sub> <sup>+</sup>    | 14.6.2018   | -           | -             | -             | -              |               |                |                |            |             | no He complexes                             |
| 32                        | 98         | C <sub>8</sub> H <sub>2</sub> <sup>+</sup>    | 14.6.2018   | -           | -             | -             | -              |               |                |                |            |             | no He complexes                             |
| 33                        | 89         | C <sub>14</sub> H <sub>10</sub> <sup>++</sup> | 13.6.2018   | vis03       | 100           | 20            | 840            |               |                |                |            | 2b          |                                             |
| 34                        | 89         | C <sub>14</sub> H <sub>10</sub> <sup>++</sup> | 14.6.2018   | vis01       | 100           | 20            | 840            |               |                |                |            | 3           |                                             |
| 35                        | 89         | C <sub>14</sub> H <sub>10</sub> <sup>++</sup> | 14.6.2018   | vis02       | 50            | 20            | 840            |               |                |                |            | 2b,3        |                                             |
| 36                        | 89         | C <sub>14</sub> H <sub>10</sub> <sup>++</sup> | 14.6.2018   | vis03       | 20            | 20            | 840            |               |                |                |            | 3           |                                             |
| 37                        | 89         | C <sub>14</sub> H <sub>10</sub> <sup>++</sup> | 14.6.2018   | vis04       | 14            | 10            | 840            |               |                |                |            | 3           | $\sigma = 5.5 \times 10^{-16} \text{ cm}^2$ |
| 38                        | 89         | C <sub>14</sub> H <sub>10</sub> <sup>++</sup> | 14.6.2018   | vis05       | 100           | 20            | 100            |               |                |                |            | 2b          |                                             |
| 39                        | 89         | C <sub>14</sub> H <sub>10</sub> <sup>++</sup> | 14.6.2018   | vis11       | 100           | 20            | 100            |               |                |                |            | 2b          |                                             |
| 40                        | 89         | C <sub>14</sub> H <sub>10</sub> <sup>++</sup> | 14.6.2018   | vis16       | 100           | 20            | 100            |               |                |                |            |             |                                             |
| 41                        | 76         | C <sub>12</sub> H <sub>8</sub> <sup>++</sup>  | 14.6.2018   | vis13       | 100           | 20            | 800            | 550.0         | 200            | 9              |            |             |                                             |
| 42                        | 63         | C <sub>10</sub> H <sub>6</sub> <sup>++</sup>  | 14.6.2018   | vis15       | 100           | 20            | 800            |               |                |                |            | 2e          | no line, att=0.4±19%                        |
| <b>Benzo[ghi]perylene</b> |            |                                               |             |             |               |               |                |               |                |                |            |             |                                             |
| <b>Nr</b>                 | <b>m/z</b> | <b>Ion</b>                                    | <b>Date</b> | <b>File</b> | <b>PO / %</b> | <b>RF / %</b> | <b>Dt / ms</b> | <b>n / nm</b> | <b>Dn / nm</b> | <b>att / %</b> | <b>fig</b> | <b>Note</b> |                                             |
| 43                        | 276        | C <sub>22</sub> H <sub>12</sub> <sup>+</sup>  | 20.6.2018   | vis03       | 100           | 20            | 800            | 465.0         | 33             | 50             |            |             |                                             |
| 44                        | 276        | C <sub>22</sub> H <sub>12</sub> <sup>+</sup>  | 20.6.2018   | vis03       | 100           | 20            | 800            | 498.0         | 27             | 87             |            |             |                                             |
| 45                        | 276        | C <sub>22</sub> H <sub>12</sub> <sup>+</sup>  | 20.6.2018   | vis03       | 100           | 20            | 800            | 550.0         | 97             | 23             |            |             |                                             |
| 46                        | 276        | C <sub>22</sub> H <sub>12</sub> <sup>+</sup>  | 20.6.2018   | vis03       | 100           | 20            | 800            | 653.0         | 68             | 50             |            |             |                                             |
| 47                        | 248        | C <sub>20</sub> H <sub>8</sub> <sup>+</sup>   | 21.6.2018   | vis12       | 100           | 20            | 800            | 440.3         | 18             | 64             |            |             |                                             |
| 48                        | 222        | C <sub>18</sub> H <sub>6</sub> <sup>+</sup>   | 21.6.2018   | vis10       | 100           | 20            | 800            |               |                |                |            |             | 440 - 580nm att 40%                         |
| 49                        | 221        | C <sub>18</sub> H <sub>5</sub> <sup>+</sup>   | 21.6.2018   | vis11       | 100           | 20            | 800            |               |                |                |            |             | 430 - 570 nm att 35%                        |
| 50                        | 138        | C <sub>22</sub> H <sub>12</sub> <sup>++</sup> | 21.6.2018   | vis01       | 100           | 20            | 800            |               |                |                |            |             |                                             |
| 51                        | 138        | C <sub>22</sub> H <sub>12</sub> <sup>++</sup> | 21.6.2018   | vis02       | 100           | 20            | 100            | 508.0         | 29             | 26             |            |             |                                             |
| 52                        | 138        | C <sub>22</sub> H <sub>12</sub> <sup>++</sup> | 21.6.2018   | vis02       | 100           | 20            | 100            | 548.0         | 35             | 62             |            |             |                                             |
| 53                        | 138        | C <sub>22</sub> H <sub>12</sub> <sup>++</sup> | 20.6.2018   | vis04       | 100           | 20            | 800            |               |                |                |            |             |                                             |
| 54                        | 138        | C <sub>22</sub> H <sub>12</sub> <sup>++</sup> | 20.6.2018   | vis05       | 100           | 20            | 100            |               |                |                |            |             |                                             |
| 55                        | 137        | C <sub>22</sub> H <sub>10</sub> <sup>++</sup> | 21.6.2018   | vis03       | 100           | 20            | 100            | 436.6         | 20             | 31             |            |             |                                             |
| 56                        | 137        | C <sub>22</sub> H <sub>10</sub> <sup>++</sup> | 20.6.2018   | vis06       | 100           | 20            | 800            |               |                |                |            |             |                                             |
| 57                        | 136        | C <sub>22</sub> H <sub>8</sub> <sup>++</sup>  | 21.6.2018   | vis04       | 100           | 20            | 800            |               |                |                |            |             |                                             |
| 58                        | 136        | C <sub>22</sub> H <sub>8</sub> <sup>++</sup>  | 21.6.2018   | vis05       | 100           | 20            | 100            |               |                |                |            |             | att < 20%                                   |
| 59                        | 125        | C <sub>20</sub> H <sub>10</sub> <sup>++</sup> | 21.6.2018   | vis06       | 100           | 20            | 800            | 442.0         | 24             | 80             |            |             |                                             |
| 60                        | 125        | C <sub>20</sub> H <sub>10</sub> <sup>++</sup> | 21.6.2018   | vis06       | 100           | 20            | 100            | 442.8         | 21             | 24             |            |             |                                             |
| 61                        | 124        | C <sub>20</sub> H <sub>8</sub> <sup>++</sup>  | 21.6.2018   | vis07       | 100           | 20            | 800            | 442.3         | 24             | 50             |            |             |                                             |
| 62                        | 124        | C <sub>20</sub> H <sub>8</sub> <sup>++</sup>  | 21.6.2018   | vis08       | 100           | 20            | 100            |               |                |                |            |             | att < 20%                                   |
| 63                        | 123        | C <sub>20</sub> H <sub>6</sub> <sup>++</sup>  | 21.6.2018   | vis09       | 100           | 20            | 800            | 453.0         | 41             | 43             |            |             |                                             |
| <b>Dibenzo[7]helicene</b> |            |                                               |             |             |               |               |                |               |                |                |            |             |                                             |

| Nr | m/z | Ion                                           | Date      | File  | PO / % | RF / % | Dt / ms | n / nm | Dn / nm | att / % | fig | Note                    |
|----|-----|-----------------------------------------------|-----------|-------|--------|--------|---------|--------|---------|---------|-----|-------------------------|
| 64 | 479 | C <sub>38</sub> H <sub>22</sub> <sup>+</sup>  | 22.6.2018 | vis01 | 100    | 20     | 800     | 450.0  |         | 20      |     |                         |
| 65 | 479 | C <sub>38</sub> H <sub>22</sub> <sup>+</sup>  | 22.6.2018 | vis01 | 100    | 20     | 800     | 550.0  |         | 70      |     |                         |
| 66 | 401 | C <sub>32</sub> H <sub>16</sub> <sup>+</sup>  | 22.6.2018 | vis03 | 100    | 20     | 800     |        |         |         | 2i  |                         |
| 67 | 401 | C <sub>32</sub> H <sub>16</sub> <sup>+</sup>  | 22.6.2018 | vis04 | 100    | 20     | 100     | 497.0  | 32      | 54      | 2i  |                         |
| 68 | 401 | C <sub>32</sub> H <sub>16</sub> <sup>+</sup>  | 22.6.2018 | vis04 | 100    | 20     | 100     | 651.0  | 40      | 27      |     |                         |
| 69 | 387 | C <sub>31</sub> H <sub>15</sub> <sup>+</sup>  | 22.6.2018 | vis05 | 100    | 20     | 800     |        |         |         |     | 430 - 650 nm att<br>75% |
| 70 | 387 | C <sub>31</sub> H <sub>15</sub> <sup>+</sup>  | 22.6.2018 | vis06 | 100    | 20     | 100     |        |         |         |     |                         |
| 71 | 237 | C <sub>38</sub> H <sub>18</sub> <sup>++</sup> | 22.6.2018 | vis08 | 100    | 20     | 800     |        |         |         |     |                         |
| 72 | 237 | C <sub>38</sub> H <sub>18</sub> <sup>++</sup> | 22.6.2018 | vis09 | 100    | 20     | 100     |        |         |         |     | broadband att 40%       |
| 73 | 200 | C <sub>32</sub> H <sub>16</sub> <sup>++</sup> | 22.6.2018 | vis07 | 100    | 20     | 800     |        |         |         |     |                         |
| 74 | 200 | C <sub>32</sub> H <sub>16</sub> <sup>++</sup> | 22.6.2018 | vis07 | 100    | 20     | 100     | 560.0  | 60      | 30      |     | broadband att           |

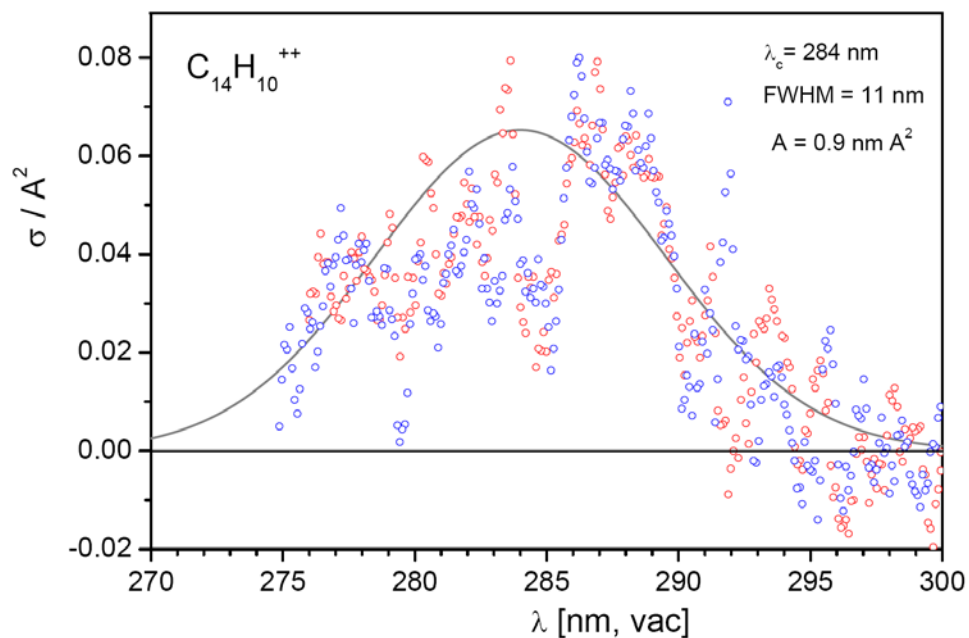

**Figure S6.** UV absorption of the anthracene dication. The spectrum features a very broad ( $\sim 10$  nm) absorption band around 285 nm. The cross section is below  $0.1 \text{ \AA}^2$ .

**Table S2.** Comparison of the vibronic spectrum of anthracene dication with DIBs.

| DIB data   |                    |                     | $\text{C}_{14}\text{H}_{10}^{2+}$ |                        | Difference/ $\text{\AA}$ |
|------------|--------------------|---------------------|-----------------------------------|------------------------|--------------------------|
| DIB number | $l_c / \text{\AA}$ | FWHM / $\text{\AA}$ | exp/ $\text{\AA}$                 | fwhm exp/ $\text{\AA}$ |                          |
| 40         | 5170.49            | 0.47                | 5160.11                           | 9.8                    | 10.38                    |
| 49         | 5262.48            | 0.54                | 5262.20                           | 6.3                    | 0.28                     |
| 63         | 5433.50            | 0.45                | 5442.56                           | 7.7                    | -9.06                    |
| 87         | 5556.44            | 1.28                | 5556.26                           | 11.3                   | 0.18                     |
| 98         | 5669.33            | 1.47                | 5674.80                           | 2.54                   | -5.47                    |

## Position of bands in helium tagging IRPD spectra of anthracene dication and monocation

**Table S3.** Peak positions in helium tagging IRPD spectrum of anthracene dication. The centers, heights and FWHM values were determined from fitting the measured IRPD spectra with Gaussian functions (see Figure S8).

| Nr | Center  | Height | Area  | FWHM |
|----|---------|--------|-------|------|
| 1  | 1172.73 | 0.25   | 1.00  | 3.8  |
| 2  | 1183.63 | 0.70   | 4.81  | 6.4  |
| 3  | 1199.70 | 0.35   | 2.54  | 6.7  |
| 4  | 1211.11 | 1.02   | 11.12 | 10.3 |
| 5  | 1269.63 | 0.13   | 1.60  | 11.8 |
| 6  | 1290.07 | 0.47   | 2.94  | 5.8  |
| 7  | 1299.51 | 0.58   | 3.48  | 5.7  |
| 8  | 1320.25 | 0.09   | 0.88  | 8.8  |
| 9  | 1329.95 | 0.29   | 1.10  | 3.6  |
| 10 | 1351.59 | 0.85   | 5.89  | 6.5  |
| 11 | 1356.73 | 0.54   | 1.70  | 2.9  |
| 12 | 1363.44 | 0.95   | 5.00  | 4.9  |
| 13 | 1372.73 | 0.83   | 5.29  | 6.0  |
| 14 | 1381.35 | 0.27   | 5.44  | 18.7 |
| 15 | 1422.48 | 0.14   | 3.43  | 22.8 |
| 16 | 1433.25 | 0.82   | 4.44  | 5.1  |
| 17 | 1445.92 | 0.99   | 7.15  | 6.8  |
| 18 | 1454.81 | 0.29   | 1.06  | 3.4  |
| 19 | 1482.21 | 1.01   | 11.62 | 10.9 |
| 20 | 1516.55 | 0.33   | 2.86  | 8.0  |
| 21 | 1566.11 | 0.99   | 19.50 | 18.5 |
| 22 | 1581.45 | 0.48   | 2.50  | 4.9  |
| 23 | 1588.62 | 0.37   | 2.14  | 5.4  |

**Table S4.** Peak positions in helium tagging IRPD spectrum of anthracene monocation. The centers, heights and FWHM values were determined from fitting the IRPD spectrum with Lorentzian functions.

| <b>Nr</b> | <b>Center</b> | <b>Height</b> | <b>Area</b> | <b>FWHM</b> |
|-----------|---------------|---------------|-------------|-------------|
| 26        | 1159.25       | 0.25          | 1.33        | 4.9         |
| 27        | 1188.95       | 0.98          | 7.63        | 7.3         |
| 28        | 1205.04       | 0.46          | 3.59        | 7.4         |
| 29        | 1221.41       | 0.22          | 1.32        | 5.7         |
| 30        | 1276.63       | 0.28          | 2.36        | 7.8         |
| 31        | 1289.68       | 0.62          | 3.23        | 4.9         |
| 32        | 1295.69       | 0.37          | 0.86        | 2.2         |
| 33        | 1315.23       | 0.93          | 4.49        | 4.6         |
| 34        | 1339.23       | 1.00          | 9.07        | 8.5         |
| 35        | 1350.97       | 0.97          | 7.17        | 6.9         |
| 36        | 1363.40       | 0.77          | 3.77        | 4.6         |
| 37        | 1401.25       | 0.72          | 3.23        | 4.2         |
| 38        | 1407.86       | 0.77          | 4.14        | 5.0         |
| 39        | 1417.26       | 0.97          | 10.77       | 10.4        |
| 40        | 1428.47       | 0.58          | 4.78        | 7.8         |
| 41        | 1447.69       | 0.49          | 1.12        | 2.2         |
| 42        | 1459.38       | 0.61          | 6.34        | 9.7         |
| 43        | 1541.59       | 0.80          | 3.63        | 4.2         |
| 44        | 1551.59       | 0.39          | 1.46        | 3.6         |
| 45        | 1564.41       | 0.22          | 1.02        | 4.4         |
| 46        | 1587.54       | 0.88          | 4.56        | 4.9         |

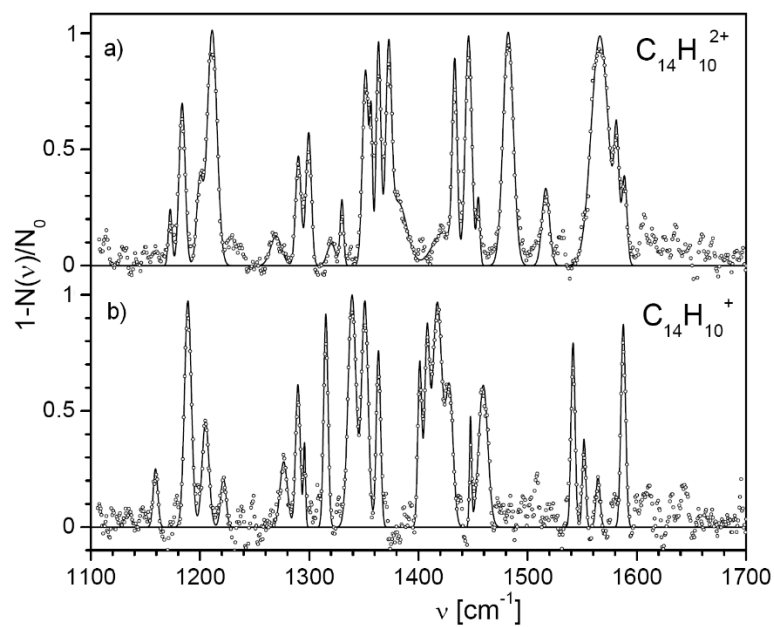

**Figure S7.** Helium tagging infrared photodissociation spectra of  $C_{14}H_{10}^{2+}$  (upper panel) and  $C_{14}H_{10}^+$  (lower panel) generated by electron ionization from anthracene. The experimental data (points) were fitted with Gaussian peaks. The characteristics of the fits are summarized in Tables S3 and S4.

## Results of DFT calculations

**Table S5.** TD-DFT (B3LYP/6-311G+(2d,p)) results for singlet state excitations.

| State (symmetry) |             | Excitation energy [eV] | Excitation energy [nm] | Oscillator strength <sup>a</sup> |
|------------------|-------------|------------------------|------------------------|----------------------------------|
| S <sub>1</sub>   | Singlet-A'  | 1.4464                 | 857.22                 | f=0.0000                         |
| S <sub>2</sub>   | Singlet-A'  | 2.4558                 | 504.87                 | f=0.1999                         |
| S <sub>3</sub>   | Singlet-A'  | 3.4283                 | 361.65                 | f=0.0734                         |
| S <sub>4</sub>   | Singlet-A'  | 3.6674                 | 338.07                 | f=0.0000                         |
| S <sub>5</sub>   | Singlet-A'' | 3.7153                 | 333.71                 | f=0.0000                         |
| S <sub>6</sub>   | Singlet-A'' | 3.7879                 | 327.31                 | f=0.0000                         |
| S <sub>7</sub>   | Singlet-A'  | 4.0739                 | 304.34                 | f=0.0000                         |
| S <sub>8</sub>   | Singlet-A'' | 4.1568                 | 298.27                 | f=0.0000                         |
| S <sub>9</sub>   | Singlet-A'  | 4.6307                 | 267.74                 | f=1.4569                         |
| S <sub>10</sub>  | Singlet-A'' | 4.6409                 | 267.16                 | f=0.0004                         |

<sup>a</sup> Definition of oscillator strength:

$$f_i = \frac{8\pi^2\tilde{\nu}_i m_e c}{3he^2} D_i$$

where  $f_i$  is the (dimensionless) oscillator strength corresponding to the electronic excitation of interest, and  $D_i$  is the corresponding dipole strength in esu<sup>2</sup> cm<sup>2</sup>;  $\tilde{\nu}$  is the corresponding excitation energy in wavenumbers. The remaining two constants are the charge on the electron:  $e = 4.803204 \times 10^{-10}$  esu and the electron mass:  $m_e = 9.10938 \times 10^{-31}$  kg.



## Anharmonic theoretical IR spectra

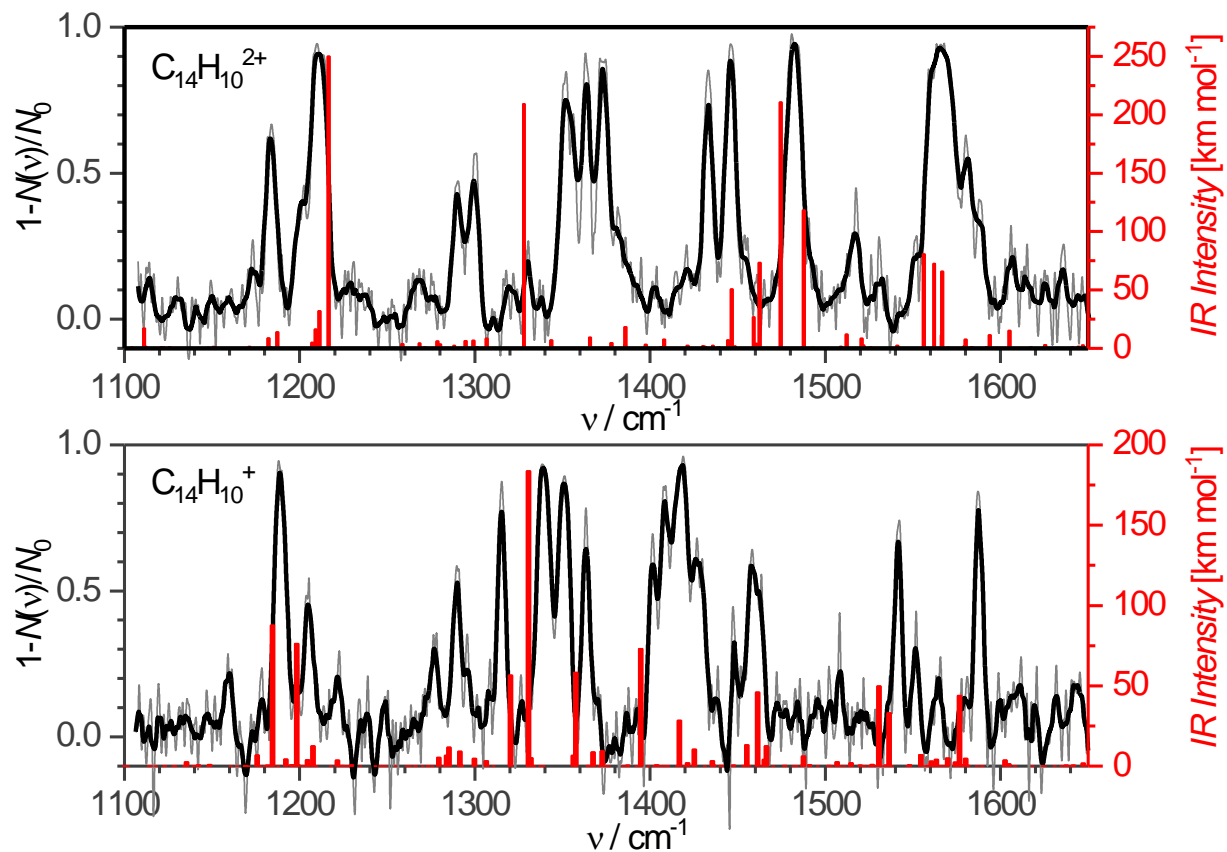

**Figure S8.** Helium tagging infrared photodissociation spectra of  $C_{14}H_{10}^{2+}$  (upper panel) and  $C_{14}H_{10}^+$  (lower panel) generated by electron ionization from anthracene. The black spectra are 5-point smoothed original data (grey). The red stick spectra correspond to the B3LYP/6-311+G(2d,p) calculated anharmonic vibrational spectra for the corresponding optimized ions.

**Table S6.** Optimized geometries and energetics of anthracene dication in the  $S_0$ ,  $T_1$ ,  $S_2$  and  $S_3$  states and anthracene monocation. Method B3LYP/6-311G+(2d,p), the  $S_2$  state was optimized using TD DFT approach.

| Ion, State, energetics, FC simulation                                                                                                                                                                                                                                                                                                                                                                                                                                                                                                                                                                                                                                                                                                                                                                                                                                                                                                                                                             | Optimized geometry                                                                                                                                                                                                                                                                                                                                                                                                                                                                                                                                                                                                                                                                                                                                                                                                                                                                                                                                                                                                                                                                                                                                                                                                                                                                                                                                                                                                    |
|---------------------------------------------------------------------------------------------------------------------------------------------------------------------------------------------------------------------------------------------------------------------------------------------------------------------------------------------------------------------------------------------------------------------------------------------------------------------------------------------------------------------------------------------------------------------------------------------------------------------------------------------------------------------------------------------------------------------------------------------------------------------------------------------------------------------------------------------------------------------------------------------------------------------------------------------------------------------------------------------------|-----------------------------------------------------------------------------------------------------------------------------------------------------------------------------------------------------------------------------------------------------------------------------------------------------------------------------------------------------------------------------------------------------------------------------------------------------------------------------------------------------------------------------------------------------------------------------------------------------------------------------------------------------------------------------------------------------------------------------------------------------------------------------------------------------------------------------------------------------------------------------------------------------------------------------------------------------------------------------------------------------------------------------------------------------------------------------------------------------------------------------------------------------------------------------------------------------------------------------------------------------------------------------------------------------------------------------------------------------------------------------------------------------------------------|
| <p><b>C<sub>14</sub>H<sub>10</sub><sup>2+</sup>: S<sub>0</sub></b><br/> <b>(E<sub>rel</sub> = 0.00 eV)</b><br/>           Charge = 2 Multiplicity = 1<br/>           Low frequencies --- -0.0003 0.0003<br/>           0.0004 2.8318 3.7989 6.4231<br/>           Low frequencies --- 79.5717 117.3439<br/>           198.9757<br/>           Zero-point correction=<br/>           0.193544 (Hartree/Particle)<br/>           Thermal correction to Energy=<br/>           0.203308<br/>           Thermal correction to Enthalpy=<br/>           0.204252<br/>           Thermal correction to Gibbs Free Energy=<br/>           0.158367<br/>           Sum of electronic and zero-point Energies=<br/>           -538.791583<br/>           Sum of electronic and thermal Energies=<br/>           -538.781820<br/>           Sum of electronic and thermal Enthalpies=<br/>           -538.780876<br/>           Sum of electronic and thermal Free<br/>           Energies= -538.826761</p> | <p>-----<br/>           Center Atomic Atomic Coordinates<br/>           (Angstroms)<br/>           Number Number Type X Y Z<br/>           -----<br/>           1 6 0 -0.013176 0.000000 0.026256<br/>           2 6 0 0.008215 0.000000 1.426808<br/>           3 6 0 1.236432 0.000000 2.122175<br/>           4 6 0 2.432709 0.000000 1.426038<br/>           5 6 0 2.434956 0.000000 0.014645<br/>           6 1 0 -0.922272 0.000000 1.984084<br/>           7 1 0 1.235547 0.000000 3.205681<br/>           8 1 0 3.375174 0.000000 1.960591<br/>           9 1 0 3.379183 0.000000 -0.519019<br/>           10 6 0 -1.227650 0.000000 -0.691497<br/>           11 6 0 -1.251652 0.000000 -2.102000<br/>           12 6 0 -0.010641 0.000000 -2.824171<br/>           13 6 0 1.203837 0.000000 -2.106419<br/>           14 6 0 1.227840 0.000000 -0.695917<br/>           15 1 0 -2.166419 0.000000 -0.145209<br/>           16 6 0 -2.458771 0.000000 -2.812562<br/>           17 1 0 2.142604 0.000000 -2.652709<br/>           18 6 0 -2.456527 0.000000 -4.223954<br/>           19 1 0 -3.402995 0.000000 -2.278895<br/>           20 1 0 -3.398990 0.000000 -4.758507<br/>           21 6 0 -1.260250 0.000000 -4.920093<br/>           22 6 0 -0.032032 0.000000 -4.224727<br/>           23 1 0 -1.259367 0.000000 -6.003598<br/>           24 1 0 0.898455 0.000000 -4.782000<br/>           -----</p> |
| <p><b>C<sub>14</sub>H<sub>10</sub><sup>2+</sup>: T<sub>1</sub></b><br/>           Charge = 2 Multiplicity = 3<br/> <b>(E<sub>rel</sub> = 0.91 eV)</b><br/>           Low frequencies --- -5.2739 -3.8162 -<br/>           2.2506 -0.0004 -0.0002 0.0003<br/>           Low frequencies --- 81.6851 104.3193<br/>           203.7275<br/>           Zero-point correction=<br/>           0.190551 (Hartree/Particle)</p>                                                                                                                                                                                                                                                                                                                                                                                                                                                                                                                                                                          | <p>-----<br/>           Center Atomic Atomic Coordinates<br/>           (Angstroms)<br/>           Number Number Type X Y Z<br/>           -----<br/>           1 6 0 -0.004945 0.000000 0.007087<br/>           2 6 0 0.013125 0.000000 1.453152<br/>           3 6 0 1.201788 0.000000 2.138345<br/>           4 6 0 2.421149 0.000000 1.426645<br/>           5 6 0 2.443578 0.000000 0.013408<br/>           6 1 0 -0.930486 0.000000 1.986941<br/>           7 1 0 1.212238 0.000000 3.221335<br/>           -----</p>                                                                                                                                                                                                                                                                                                                                                                                                                                                                                                                                                                                                                                                                                                                                                                                                                                                                                           |

|                                                                                                                                          |                  |                  |                |                                     |           |           |
|------------------------------------------------------------------------------------------------------------------------------------------|------------------|------------------|----------------|-------------------------------------|-----------|-----------|
| Thermal correction to Energy=<br>0.200842                                                                                                | 8                | 1                | 0              | 3.360343                            | 0.000000  | 1.968786  |
| Thermal correction to Enthalpy=<br>0.201787                                                                                              | 9                | 1                | 0              | 3.397631                            | 0.000000  | -0.501805 |
| Thermal correction to Gibbs Free Energy=<br>0.153860                                                                                     | 10               | 6                | 0              | -1.214825                           | 0.000000  | -0.698949 |
| Sum of electronic and zero-point Energies=<br>-538.758173                                                                                | 11               | 6                | 0              | -1.230927                           | 0.000000  | -2.099677 |
| Sum of electronic and thermal Energies=<br>-538.747882                                                                                   | 12               | 6                | 0              | 0.019346                            | 0.000000  | -2.832869 |
| Sum of electronic and thermal Enthalpies=<br>-538.746938                                                                                 | 13               | 6                | 0              | 1.232894                            | 0.000000  | -2.123342 |
| Sum of electronic and thermal Free<br>Energies= -538.794865                                                                              | 14               | 6                | 0              | 1.250218                            | 0.000000  | -0.717701 |
|                                                                                                                                          | 15               | 1                | 0              | -2.152160                           | 0.000000  | -0.153488 |
|                                                                                                                                          | 16               | 6                | 0              | -2.479252                           | 0.000000  | -2.829823 |
|                                                                                                                                          | 17               | 1                | 0              | 2.170377                            | 0.000000  | -2.668887 |
|                                                                                                                                          | 18               | 6                | 0              | -2.487714                           | 0.000000  | -4.201806 |
|                                                                                                                                          | 19               | 1                | 0              | -3.409541                           | 0.000000  | -2.273141 |
|                                                                                                                                          | 20               | 1                | 0              | -3.424135                           | 0.000000  | -4.745949 |
|                                                                                                                                          | 21               | 6                | 0              | -1.266508                           | 0.000000  | -4.910337 |
|                                                                                                                                          | 22               | 6                | 0              | -0.026716                           | 0.000000  | -4.231620 |
|                                                                                                                                          | 23               | 1                | 0              | -1.273850                           | 0.000000  | -5.994748 |
|                                                                                                                                          | 24               | 1                | 0              | 0.892581                            | 0.000000  | -4.806558 |
| -----                                                                                                                                    |                  |                  |                |                                     |           |           |
| <b>C<sub>14</sub>H<sub>10</sub><sup>2+</sup>: S<sub>2</sub></b><br>Charge = 2 Multiplicity = 1<br><br><b>(E<sub>rel</sub> = 2.35 eV)</b> | -----            |                  |                |                                     |           |           |
|                                                                                                                                          | Center<br>Number | Atomic<br>Number | Atomic<br>Type | Coordinates<br>(Angstroms)<br>X Y Z |           |           |
|                                                                                                                                          | -----            |                  |                |                                     |           |           |
| #B3LYP/6-311+G(2d,p) TD(NStates=1,<br>Root=2) opt freq                                                                                   | 1                | 6                | 0              | -0.715442                           | 1.232205  | 0.000000  |
| Low frequencies --- -6.3768 -3.0319 -<br>2.1604 -0.0008 -0.0008 -0.0005                                                                  | 2                | 6                | 0              | -1.402046                           | 2.476935  | 0.000000  |
| Low frequencies --- 82.0603 104.6265<br>206.9561                                                                                         | 3                | 6                | 0              | -0.695835                           | 3.692524  | 0.000000  |
| Zero-point correction=<br>0.190926 (Hartree/Particle)                                                                                    | 4                | 6                | 0              | 0.695835                            | 3.692524  | 0.000000  |
| Thermal correction to Energy=<br>0.201091                                                                                                | 5                | 6                | 0              | 1.402046                            | 2.476935  | 0.000000  |
| Thermal correction to Enthalpy=<br>0.202035                                                                                              | 6                | 1                | 0              | -2.486983                           | 2.486679  | 0.000000  |
| Thermal correction to Gibbs Free Energy=<br>0.155435                                                                                     | 7                | 1                | 0              | -1.243799                           | 4.627079  | 0.000000  |
| Sum of electronic and zero-point Energies=<br>-538.705363                                                                                | 8                | 1                | 0              | 1.243799                            | 4.627080  | 0.000000  |
| Sum of electronic and thermal Energies=<br>-538.695198                                                                                   | 9                | 1                | 0              | 2.486983                            | 2.486679  | 0.000000  |
| Sum of electronic and thermal Enthalpies=<br>-538.694253                                                                                 | 10               | 6                | 0              | -1.407390                           | 0.000000  | 0.000000  |
| Sum of electronic and thermal Free<br>Energies= -538.740853                                                                              | 11               | 6                | 0              | -0.715442                           | -1.232205 | 0.000000  |
|                                                                                                                                          | 12               | 6                | 0              | 0.715442                            | -1.232205 | 0.000000  |
|                                                                                                                                          | 13               | 6                | 0              | 1.407390                            | 0.000000  | 0.000000  |
|                                                                                                                                          | 14               | 6                | 0              | 0.715442                            | 1.232205  | 0.000000  |
|                                                                                                                                          | 15               | 1                | 0              | -2.492391                           | 0.000000  | 0.000000  |
|                                                                                                                                          | 16               | 6                | 0              | -1.402046                           | -2.476935 | 0.000000  |
|                                                                                                                                          | 17               | 1                | 0              | 2.492391                            | 0.000000  | 0.000000  |
|                                                                                                                                          | 18               | 6                | 0              | -0.695835                           | -3.692524 | 0.000000  |
|                                                                                                                                          | 19               | 1                | 0              | -2.486983                           | -2.486679 | 0.000000  |
|                                                                                                                                          | 20               | 1                | 0              | -1.243799                           | -4.627079 | 0.000000  |
|                                                                                                                                          | 21               | 6                | 0              | 0.695835                            | -3.692524 | 0.000000  |
|                                                                                                                                          | 22               | 6                | 0              | 1.402046                            | -2.476935 | 0.000000  |
|                                                                                                                                          | 23               | 1                | 0              | 1.243799                            | -4.627079 | 0.000000  |
|                                                                                                                                          | 24               | 1                | 0              | 2.486983                            | -2.486679 | 0.000000  |
|                                                                                                                                          | -----            |                  |                |                                     |           |           |

| <p>Vibronic calculations:</p> <p>Energy = 0.0000 cm<sup>-1</sup>:  0&gt; -&gt;  0&gt;<br/>-&gt; Intensity = 0.2896E+08 (DipStr = 2.337)</p> <p>Energy = 388.0088 cm<sup>-1</sup>:  0&gt; -&gt;  8<sup>1</sup>&gt;<br/>-&gt; Intensity = 0.8144E+07 (DipStr = 0.6430)</p> <p>Energy = 776.0175 cm<sup>-1</sup>:  0&gt; -&gt;  8<sup>2</sup>&gt;<br/>-&gt; Intensity = 0.1100E+07 (DipStr = 0.8501E-01)</p> <p>Energy = 1256.7186 cm<sup>-1</sup>:  0&gt; -&gt;  42<sup>1</sup>&gt;<br/>-&gt; Intensity = 0.7387E+06 (DipStr = 0.5564E-01)</p> <p>Energy = 1404.5440 cm<sup>-1</sup>:  0&gt; -&gt;  46<sup>1</sup>&gt;<br/>-&gt; Intensity = 0.3186E+07 (DipStr = 0.2381)</p> <p>Energy = 1792.5527 cm<sup>-1</sup>:  0&gt; -&gt;  46<sup>1</sup>;8<sup>1</sup>&gt;<br/>-&gt; Intensity = 0.8564E+06 (DipStr = 0.6273E-01)</p> |                                                                                                                                                                                                                                                                                                                                                                                                                                                                                                                                                                                                                                                                                                                                                                                                                                                                                                                                                                                                                                                                                                                                                                                                                                                                                                                                                                                                                                                                                                                                                                                                                                                                                                                                                                                                                                                                                                                                                                                                                                                                                                                                                                                                                                                              |        |             |           |           |  |  |  |        |        |        |             |  |  |        |        |      |   |   |   |       |  |  |  |  |  |  |   |   |   |          |          |          |   |   |   |          |          |          |   |   |   |          |          |          |   |   |   |          |          |          |   |   |   |          |          |          |   |   |   |           |          |          |   |   |   |          |           |          |   |   |   |          |          |          |   |   |   |          |          |           |    |   |   |           |          |           |    |   |   |           |          |           |    |   |   |          |          |           |    |   |   |          |          |           |    |   |   |          |          |           |    |   |   |           |          |           |    |   |   |           |          |           |    |   |   |          |           |           |    |   |   |           |          |           |    |   |   |           |          |           |    |   |   |           |          |           |
|------------------------------------------------------------------------------------------------------------------------------------------------------------------------------------------------------------------------------------------------------------------------------------------------------------------------------------------------------------------------------------------------------------------------------------------------------------------------------------------------------------------------------------------------------------------------------------------------------------------------------------------------------------------------------------------------------------------------------------------------------------------------------------------------------------------------------|--------------------------------------------------------------------------------------------------------------------------------------------------------------------------------------------------------------------------------------------------------------------------------------------------------------------------------------------------------------------------------------------------------------------------------------------------------------------------------------------------------------------------------------------------------------------------------------------------------------------------------------------------------------------------------------------------------------------------------------------------------------------------------------------------------------------------------------------------------------------------------------------------------------------------------------------------------------------------------------------------------------------------------------------------------------------------------------------------------------------------------------------------------------------------------------------------------------------------------------------------------------------------------------------------------------------------------------------------------------------------------------------------------------------------------------------------------------------------------------------------------------------------------------------------------------------------------------------------------------------------------------------------------------------------------------------------------------------------------------------------------------------------------------------------------------------------------------------------------------------------------------------------------------------------------------------------------------------------------------------------------------------------------------------------------------------------------------------------------------------------------------------------------------------------------------------------------------------------------------------------------------|--------|-------------|-----------|-----------|--|--|--|--------|--------|--------|-------------|--|--|--------|--------|------|---|---|---|-------|--|--|--|--|--|--|---|---|---|----------|----------|----------|---|---|---|----------|----------|----------|---|---|---|----------|----------|----------|---|---|---|----------|----------|----------|---|---|---|----------|----------|----------|---|---|---|-----------|----------|----------|---|---|---|----------|-----------|----------|---|---|---|----------|----------|----------|---|---|---|----------|----------|-----------|----|---|---|-----------|----------|-----------|----|---|---|-----------|----------|-----------|----|---|---|----------|----------|-----------|----|---|---|----------|----------|-----------|----|---|---|----------|----------|-----------|----|---|---|-----------|----------|-----------|----|---|---|-----------|----------|-----------|----|---|---|----------|-----------|-----------|----|---|---|-----------|----------|-----------|----|---|---|-----------|----------|-----------|----|---|---|-----------|----------|-----------|
| <p><b>C<sub>14</sub>H<sub>10</sub><sup>2+</sup>: S<sub>3</sub></b><br/>Charge = 2 Multiplicity = 1</p> <p><b>(E<sub>rel</sub> = 3.03 eV)</b></p> <p>Low frequencies --- -3.6835 -3.6507 -1.9672 -0.0006 0.0001 0.0003<br/>Low frequencies --- 23.5264 105.7827 144.9559</p> <p>Zero-point correction=<br/>0.185266 (Hartree/Particle)<br/>Thermal correction to Energy=<br/>0.195755<br/>Thermal correction to Enthalpy=<br/>0.196700<br/>Thermal correction to Gibbs Free Energy=<br/>0.148452<br/>Sum of electronic and zero-point Energies=<br/>-538.680326<br/>Sum of electronic and thermal Energies=<br/>-538.669837<br/>Sum of electronic and thermal Enthalpies=<br/>-538.668893</p>                                                                                                                                 | <table border="1"> <thead> <tr> <th colspan="7">-----</th> </tr> <tr> <th>Center</th> <th>Atomic</th> <th>Atomic</th> <th colspan="3">Coordinates</th> </tr> <tr> <th>Number</th> <th>Number</th> <th>Type</th> <th>X</th> <th>Y</th> <th>Z</th> </tr> <tr> <th colspan="7">-----</th> </tr> </thead> <tbody> <tr><td>1</td><td>6</td><td>0</td><td>0.000000</td><td>0.000000</td><td>0.000000</td></tr> <tr><td>2</td><td>6</td><td>0</td><td>0.000000</td><td>0.000000</td><td>1.414923</td></tr> <tr><td>3</td><td>6</td><td>0</td><td>1.167229</td><td>0.000000</td><td>2.158415</td></tr> <tr><td>4</td><td>6</td><td>0</td><td>2.409592</td><td>0.072357</td><td>1.507893</td></tr> <tr><td>5</td><td>6</td><td>0</td><td>2.461324</td><td>0.091739</td><td>0.126584</td></tr> <tr><td>6</td><td>1</td><td>0</td><td>-0.960899</td><td>0.069310</td><td>1.924298</td></tr> <tr><td>7</td><td>1</td><td>0</td><td>1.126125</td><td>-0.037210</td><td>3.241265</td></tr> <tr><td>8</td><td>1</td><td>0</td><td>3.323729</td><td>0.088019</td><td>2.090616</td></tr> <tr><td>9</td><td>1</td><td>0</td><td>3.425923</td><td>0.037867</td><td>-0.376605</td></tr> <tr><td>10</td><td>6</td><td>0</td><td>-1.143686</td><td>0.040078</td><td>-0.805274</td></tr> <tr><td>11</td><td>6</td><td>0</td><td>-1.156396</td><td>0.027892</td><td>-2.204470</td></tr> <tr><td>12</td><td>6</td><td>0</td><td>0.135831</td><td>0.130186</td><td>-2.883272</td></tr> <tr><td>13</td><td>6</td><td>0</td><td>1.276840</td><td>0.077602</td><td>-2.074529</td></tr> <tr><td>14</td><td>6</td><td>0</td><td>1.294077</td><td>0.102234</td><td>-0.675321</td></tr> <tr><td>15</td><td>1</td><td>0</td><td>-2.100104</td><td>0.210237</td><td>-0.301395</td></tr> <tr><td>16</td><td>6</td><td>0</td><td>-2.320379</td><td>0.055900</td><td>-3.008483</td></tr> <tr><td>17</td><td>1</td><td>0</td><td>2.227539</td><td>-0.136192</td><td>-2.575951</td></tr> <tr><td>18</td><td>6</td><td>0</td><td>-2.268431</td><td>0.082794</td><td>-4.391159</td></tr> <tr><td>19</td><td>1</td><td>0</td><td>-3.284929</td><td>0.125257</td><td>-2.506075</td></tr> <tr><td>20</td><td>1</td><td>0</td><td>-3.182973</td><td>0.066549</td><td>-4.973383</td></tr> </tbody> </table> | -----  |             |           |           |  |  |  | Center | Atomic | Atomic | Coordinates |  |  | Number | Number | Type | X | Y | Z | ----- |  |  |  |  |  |  | 1 | 6 | 0 | 0.000000 | 0.000000 | 0.000000 | 2 | 6 | 0 | 0.000000 | 0.000000 | 1.414923 | 3 | 6 | 0 | 1.167229 | 0.000000 | 2.158415 | 4 | 6 | 0 | 2.409592 | 0.072357 | 1.507893 | 5 | 6 | 0 | 2.461324 | 0.091739 | 0.126584 | 6 | 1 | 0 | -0.960899 | 0.069310 | 1.924298 | 7 | 1 | 0 | 1.126125 | -0.037210 | 3.241265 | 8 | 1 | 0 | 3.323729 | 0.088019 | 2.090616 | 9 | 1 | 0 | 3.425923 | 0.037867 | -0.376605 | 10 | 6 | 0 | -1.143686 | 0.040078 | -0.805274 | 11 | 6 | 0 | -1.156396 | 0.027892 | -2.204470 | 12 | 6 | 0 | 0.135831 | 0.130186 | -2.883272 | 13 | 6 | 0 | 1.276840 | 0.077602 | -2.074529 | 14 | 6 | 0 | 1.294077 | 0.102234 | -0.675321 | 15 | 1 | 0 | -2.100104 | 0.210237 | -0.301395 | 16 | 6 | 0 | -2.320379 | 0.055900 | -3.008483 | 17 | 1 | 0 | 2.227539 | -0.136192 | -2.575951 | 18 | 6 | 0 | -2.268431 | 0.082794 | -4.391159 | 19 | 1 | 0 | -3.284929 | 0.125257 | -2.506075 | 20 | 1 | 0 | -3.182973 | 0.066549 | -4.973383 |
| -----                                                                                                                                                                                                                                                                                                                                                                                                                                                                                                                                                                                                                                                                                                                                                                                                                        |                                                                                                                                                                                                                                                                                                                                                                                                                                                                                                                                                                                                                                                                                                                                                                                                                                                                                                                                                                                                                                                                                                                                                                                                                                                                                                                                                                                                                                                                                                                                                                                                                                                                                                                                                                                                                                                                                                                                                                                                                                                                                                                                                                                                                                                              |        |             |           |           |  |  |  |        |        |        |             |  |  |        |        |      |   |   |   |       |  |  |  |  |  |  |   |   |   |          |          |          |   |   |   |          |          |          |   |   |   |          |          |          |   |   |   |          |          |          |   |   |   |          |          |          |   |   |   |           |          |          |   |   |   |          |           |          |   |   |   |          |          |          |   |   |   |          |          |           |    |   |   |           |          |           |    |   |   |           |          |           |    |   |   |          |          |           |    |   |   |          |          |           |    |   |   |          |          |           |    |   |   |           |          |           |    |   |   |           |          |           |    |   |   |          |           |           |    |   |   |           |          |           |    |   |   |           |          |           |    |   |   |           |          |           |
| Center                                                                                                                                                                                                                                                                                                                                                                                                                                                                                                                                                                                                                                                                                                                                                                                                                       | Atomic                                                                                                                                                                                                                                                                                                                                                                                                                                                                                                                                                                                                                                                                                                                                                                                                                                                                                                                                                                                                                                                                                                                                                                                                                                                                                                                                                                                                                                                                                                                                                                                                                                                                                                                                                                                                                                                                                                                                                                                                                                                                                                                                                                                                                                                       | Atomic | Coordinates |           |           |  |  |  |        |        |        |             |  |  |        |        |      |   |   |   |       |  |  |  |  |  |  |   |   |   |          |          |          |   |   |   |          |          |          |   |   |   |          |          |          |   |   |   |          |          |          |   |   |   |          |          |          |   |   |   |           |          |          |   |   |   |          |           |          |   |   |   |          |          |          |   |   |   |          |          |           |    |   |   |           |          |           |    |   |   |           |          |           |    |   |   |          |          |           |    |   |   |          |          |           |    |   |   |          |          |           |    |   |   |           |          |           |    |   |   |           |          |           |    |   |   |          |           |           |    |   |   |           |          |           |    |   |   |           |          |           |    |   |   |           |          |           |
| Number                                                                                                                                                                                                                                                                                                                                                                                                                                                                                                                                                                                                                                                                                                                                                                                                                       | Number                                                                                                                                                                                                                                                                                                                                                                                                                                                                                                                                                                                                                                                                                                                                                                                                                                                                                                                                                                                                                                                                                                                                                                                                                                                                                                                                                                                                                                                                                                                                                                                                                                                                                                                                                                                                                                                                                                                                                                                                                                                                                                                                                                                                                                                       | Type   | X           | Y         | Z         |  |  |  |        |        |        |             |  |  |        |        |      |   |   |   |       |  |  |  |  |  |  |   |   |   |          |          |          |   |   |   |          |          |          |   |   |   |          |          |          |   |   |   |          |          |          |   |   |   |          |          |          |   |   |   |           |          |          |   |   |   |          |           |          |   |   |   |          |          |          |   |   |   |          |          |           |    |   |   |           |          |           |    |   |   |           |          |           |    |   |   |          |          |           |    |   |   |          |          |           |    |   |   |          |          |           |    |   |   |           |          |           |    |   |   |           |          |           |    |   |   |          |           |           |    |   |   |           |          |           |    |   |   |           |          |           |    |   |   |           |          |           |
| -----                                                                                                                                                                                                                                                                                                                                                                                                                                                                                                                                                                                                                                                                                                                                                                                                                        |                                                                                                                                                                                                                                                                                                                                                                                                                                                                                                                                                                                                                                                                                                                                                                                                                                                                                                                                                                                                                                                                                                                                                                                                                                                                                                                                                                                                                                                                                                                                                                                                                                                                                                                                                                                                                                                                                                                                                                                                                                                                                                                                                                                                                                                              |        |             |           |           |  |  |  |        |        |        |             |  |  |        |        |      |   |   |   |       |  |  |  |  |  |  |   |   |   |          |          |          |   |   |   |          |          |          |   |   |   |          |          |          |   |   |   |          |          |          |   |   |   |          |          |          |   |   |   |           |          |          |   |   |   |          |           |          |   |   |   |          |          |          |   |   |   |          |          |           |    |   |   |           |          |           |    |   |   |           |          |           |    |   |   |          |          |           |    |   |   |          |          |           |    |   |   |          |          |           |    |   |   |           |          |           |    |   |   |           |          |           |    |   |   |          |           |           |    |   |   |           |          |           |    |   |   |           |          |           |    |   |   |           |          |           |
| 1                                                                                                                                                                                                                                                                                                                                                                                                                                                                                                                                                                                                                                                                                                                                                                                                                            | 6                                                                                                                                                                                                                                                                                                                                                                                                                                                                                                                                                                                                                                                                                                                                                                                                                                                                                                                                                                                                                                                                                                                                                                                                                                                                                                                                                                                                                                                                                                                                                                                                                                                                                                                                                                                                                                                                                                                                                                                                                                                                                                                                                                                                                                                            | 0      | 0.000000    | 0.000000  | 0.000000  |  |  |  |        |        |        |             |  |  |        |        |      |   |   |   |       |  |  |  |  |  |  |   |   |   |          |          |          |   |   |   |          |          |          |   |   |   |          |          |          |   |   |   |          |          |          |   |   |   |          |          |          |   |   |   |           |          |          |   |   |   |          |           |          |   |   |   |          |          |          |   |   |   |          |          |           |    |   |   |           |          |           |    |   |   |           |          |           |    |   |   |          |          |           |    |   |   |          |          |           |    |   |   |          |          |           |    |   |   |           |          |           |    |   |   |           |          |           |    |   |   |          |           |           |    |   |   |           |          |           |    |   |   |           |          |           |    |   |   |           |          |           |
| 2                                                                                                                                                                                                                                                                                                                                                                                                                                                                                                                                                                                                                                                                                                                                                                                                                            | 6                                                                                                                                                                                                                                                                                                                                                                                                                                                                                                                                                                                                                                                                                                                                                                                                                                                                                                                                                                                                                                                                                                                                                                                                                                                                                                                                                                                                                                                                                                                                                                                                                                                                                                                                                                                                                                                                                                                                                                                                                                                                                                                                                                                                                                                            | 0      | 0.000000    | 0.000000  | 1.414923  |  |  |  |        |        |        |             |  |  |        |        |      |   |   |   |       |  |  |  |  |  |  |   |   |   |          |          |          |   |   |   |          |          |          |   |   |   |          |          |          |   |   |   |          |          |          |   |   |   |          |          |          |   |   |   |           |          |          |   |   |   |          |           |          |   |   |   |          |          |          |   |   |   |          |          |           |    |   |   |           |          |           |    |   |   |           |          |           |    |   |   |          |          |           |    |   |   |          |          |           |    |   |   |          |          |           |    |   |   |           |          |           |    |   |   |           |          |           |    |   |   |          |           |           |    |   |   |           |          |           |    |   |   |           |          |           |    |   |   |           |          |           |
| 3                                                                                                                                                                                                                                                                                                                                                                                                                                                                                                                                                                                                                                                                                                                                                                                                                            | 6                                                                                                                                                                                                                                                                                                                                                                                                                                                                                                                                                                                                                                                                                                                                                                                                                                                                                                                                                                                                                                                                                                                                                                                                                                                                                                                                                                                                                                                                                                                                                                                                                                                                                                                                                                                                                                                                                                                                                                                                                                                                                                                                                                                                                                                            | 0      | 1.167229    | 0.000000  | 2.158415  |  |  |  |        |        |        |             |  |  |        |        |      |   |   |   |       |  |  |  |  |  |  |   |   |   |          |          |          |   |   |   |          |          |          |   |   |   |          |          |          |   |   |   |          |          |          |   |   |   |          |          |          |   |   |   |           |          |          |   |   |   |          |           |          |   |   |   |          |          |          |   |   |   |          |          |           |    |   |   |           |          |           |    |   |   |           |          |           |    |   |   |          |          |           |    |   |   |          |          |           |    |   |   |          |          |           |    |   |   |           |          |           |    |   |   |           |          |           |    |   |   |          |           |           |    |   |   |           |          |           |    |   |   |           |          |           |    |   |   |           |          |           |
| 4                                                                                                                                                                                                                                                                                                                                                                                                                                                                                                                                                                                                                                                                                                                                                                                                                            | 6                                                                                                                                                                                                                                                                                                                                                                                                                                                                                                                                                                                                                                                                                                                                                                                                                                                                                                                                                                                                                                                                                                                                                                                                                                                                                                                                                                                                                                                                                                                                                                                                                                                                                                                                                                                                                                                                                                                                                                                                                                                                                                                                                                                                                                                            | 0      | 2.409592    | 0.072357  | 1.507893  |  |  |  |        |        |        |             |  |  |        |        |      |   |   |   |       |  |  |  |  |  |  |   |   |   |          |          |          |   |   |   |          |          |          |   |   |   |          |          |          |   |   |   |          |          |          |   |   |   |          |          |          |   |   |   |           |          |          |   |   |   |          |           |          |   |   |   |          |          |          |   |   |   |          |          |           |    |   |   |           |          |           |    |   |   |           |          |           |    |   |   |          |          |           |    |   |   |          |          |           |    |   |   |          |          |           |    |   |   |           |          |           |    |   |   |           |          |           |    |   |   |          |           |           |    |   |   |           |          |           |    |   |   |           |          |           |    |   |   |           |          |           |
| 5                                                                                                                                                                                                                                                                                                                                                                                                                                                                                                                                                                                                                                                                                                                                                                                                                            | 6                                                                                                                                                                                                                                                                                                                                                                                                                                                                                                                                                                                                                                                                                                                                                                                                                                                                                                                                                                                                                                                                                                                                                                                                                                                                                                                                                                                                                                                                                                                                                                                                                                                                                                                                                                                                                                                                                                                                                                                                                                                                                                                                                                                                                                                            | 0      | 2.461324    | 0.091739  | 0.126584  |  |  |  |        |        |        |             |  |  |        |        |      |   |   |   |       |  |  |  |  |  |  |   |   |   |          |          |          |   |   |   |          |          |          |   |   |   |          |          |          |   |   |   |          |          |          |   |   |   |          |          |          |   |   |   |           |          |          |   |   |   |          |           |          |   |   |   |          |          |          |   |   |   |          |          |           |    |   |   |           |          |           |    |   |   |           |          |           |    |   |   |          |          |           |    |   |   |          |          |           |    |   |   |          |          |           |    |   |   |           |          |           |    |   |   |           |          |           |    |   |   |          |           |           |    |   |   |           |          |           |    |   |   |           |          |           |    |   |   |           |          |           |
| 6                                                                                                                                                                                                                                                                                                                                                                                                                                                                                                                                                                                                                                                                                                                                                                                                                            | 1                                                                                                                                                                                                                                                                                                                                                                                                                                                                                                                                                                                                                                                                                                                                                                                                                                                                                                                                                                                                                                                                                                                                                                                                                                                                                                                                                                                                                                                                                                                                                                                                                                                                                                                                                                                                                                                                                                                                                                                                                                                                                                                                                                                                                                                            | 0      | -0.960899   | 0.069310  | 1.924298  |  |  |  |        |        |        |             |  |  |        |        |      |   |   |   |       |  |  |  |  |  |  |   |   |   |          |          |          |   |   |   |          |          |          |   |   |   |          |          |          |   |   |   |          |          |          |   |   |   |          |          |          |   |   |   |           |          |          |   |   |   |          |           |          |   |   |   |          |          |          |   |   |   |          |          |           |    |   |   |           |          |           |    |   |   |           |          |           |    |   |   |          |          |           |    |   |   |          |          |           |    |   |   |          |          |           |    |   |   |           |          |           |    |   |   |           |          |           |    |   |   |          |           |           |    |   |   |           |          |           |    |   |   |           |          |           |    |   |   |           |          |           |
| 7                                                                                                                                                                                                                                                                                                                                                                                                                                                                                                                                                                                                                                                                                                                                                                                                                            | 1                                                                                                                                                                                                                                                                                                                                                                                                                                                                                                                                                                                                                                                                                                                                                                                                                                                                                                                                                                                                                                                                                                                                                                                                                                                                                                                                                                                                                                                                                                                                                                                                                                                                                                                                                                                                                                                                                                                                                                                                                                                                                                                                                                                                                                                            | 0      | 1.126125    | -0.037210 | 3.241265  |  |  |  |        |        |        |             |  |  |        |        |      |   |   |   |       |  |  |  |  |  |  |   |   |   |          |          |          |   |   |   |          |          |          |   |   |   |          |          |          |   |   |   |          |          |          |   |   |   |          |          |          |   |   |   |           |          |          |   |   |   |          |           |          |   |   |   |          |          |          |   |   |   |          |          |           |    |   |   |           |          |           |    |   |   |           |          |           |    |   |   |          |          |           |    |   |   |          |          |           |    |   |   |          |          |           |    |   |   |           |          |           |    |   |   |           |          |           |    |   |   |          |           |           |    |   |   |           |          |           |    |   |   |           |          |           |    |   |   |           |          |           |
| 8                                                                                                                                                                                                                                                                                                                                                                                                                                                                                                                                                                                                                                                                                                                                                                                                                            | 1                                                                                                                                                                                                                                                                                                                                                                                                                                                                                                                                                                                                                                                                                                                                                                                                                                                                                                                                                                                                                                                                                                                                                                                                                                                                                                                                                                                                                                                                                                                                                                                                                                                                                                                                                                                                                                                                                                                                                                                                                                                                                                                                                                                                                                                            | 0      | 3.323729    | 0.088019  | 2.090616  |  |  |  |        |        |        |             |  |  |        |        |      |   |   |   |       |  |  |  |  |  |  |   |   |   |          |          |          |   |   |   |          |          |          |   |   |   |          |          |          |   |   |   |          |          |          |   |   |   |          |          |          |   |   |   |           |          |          |   |   |   |          |           |          |   |   |   |          |          |          |   |   |   |          |          |           |    |   |   |           |          |           |    |   |   |           |          |           |    |   |   |          |          |           |    |   |   |          |          |           |    |   |   |          |          |           |    |   |   |           |          |           |    |   |   |           |          |           |    |   |   |          |           |           |    |   |   |           |          |           |    |   |   |           |          |           |    |   |   |           |          |           |
| 9                                                                                                                                                                                                                                                                                                                                                                                                                                                                                                                                                                                                                                                                                                                                                                                                                            | 1                                                                                                                                                                                                                                                                                                                                                                                                                                                                                                                                                                                                                                                                                                                                                                                                                                                                                                                                                                                                                                                                                                                                                                                                                                                                                                                                                                                                                                                                                                                                                                                                                                                                                                                                                                                                                                                                                                                                                                                                                                                                                                                                                                                                                                                            | 0      | 3.425923    | 0.037867  | -0.376605 |  |  |  |        |        |        |             |  |  |        |        |      |   |   |   |       |  |  |  |  |  |  |   |   |   |          |          |          |   |   |   |          |          |          |   |   |   |          |          |          |   |   |   |          |          |          |   |   |   |          |          |          |   |   |   |           |          |          |   |   |   |          |           |          |   |   |   |          |          |          |   |   |   |          |          |           |    |   |   |           |          |           |    |   |   |           |          |           |    |   |   |          |          |           |    |   |   |          |          |           |    |   |   |          |          |           |    |   |   |           |          |           |    |   |   |           |          |           |    |   |   |          |           |           |    |   |   |           |          |           |    |   |   |           |          |           |    |   |   |           |          |           |
| 10                                                                                                                                                                                                                                                                                                                                                                                                                                                                                                                                                                                                                                                                                                                                                                                                                           | 6                                                                                                                                                                                                                                                                                                                                                                                                                                                                                                                                                                                                                                                                                                                                                                                                                                                                                                                                                                                                                                                                                                                                                                                                                                                                                                                                                                                                                                                                                                                                                                                                                                                                                                                                                                                                                                                                                                                                                                                                                                                                                                                                                                                                                                                            | 0      | -1.143686   | 0.040078  | -0.805274 |  |  |  |        |        |        |             |  |  |        |        |      |   |   |   |       |  |  |  |  |  |  |   |   |   |          |          |          |   |   |   |          |          |          |   |   |   |          |          |          |   |   |   |          |          |          |   |   |   |          |          |          |   |   |   |           |          |          |   |   |   |          |           |          |   |   |   |          |          |          |   |   |   |          |          |           |    |   |   |           |          |           |    |   |   |           |          |           |    |   |   |          |          |           |    |   |   |          |          |           |    |   |   |          |          |           |    |   |   |           |          |           |    |   |   |           |          |           |    |   |   |          |           |           |    |   |   |           |          |           |    |   |   |           |          |           |    |   |   |           |          |           |
| 11                                                                                                                                                                                                                                                                                                                                                                                                                                                                                                                                                                                                                                                                                                                                                                                                                           | 6                                                                                                                                                                                                                                                                                                                                                                                                                                                                                                                                                                                                                                                                                                                                                                                                                                                                                                                                                                                                                                                                                                                                                                                                                                                                                                                                                                                                                                                                                                                                                                                                                                                                                                                                                                                                                                                                                                                                                                                                                                                                                                                                                                                                                                                            | 0      | -1.156396   | 0.027892  | -2.204470 |  |  |  |        |        |        |             |  |  |        |        |      |   |   |   |       |  |  |  |  |  |  |   |   |   |          |          |          |   |   |   |          |          |          |   |   |   |          |          |          |   |   |   |          |          |          |   |   |   |          |          |          |   |   |   |           |          |          |   |   |   |          |           |          |   |   |   |          |          |          |   |   |   |          |          |           |    |   |   |           |          |           |    |   |   |           |          |           |    |   |   |          |          |           |    |   |   |          |          |           |    |   |   |          |          |           |    |   |   |           |          |           |    |   |   |           |          |           |    |   |   |          |           |           |    |   |   |           |          |           |    |   |   |           |          |           |    |   |   |           |          |           |
| 12                                                                                                                                                                                                                                                                                                                                                                                                                                                                                                                                                                                                                                                                                                                                                                                                                           | 6                                                                                                                                                                                                                                                                                                                                                                                                                                                                                                                                                                                                                                                                                                                                                                                                                                                                                                                                                                                                                                                                                                                                                                                                                                                                                                                                                                                                                                                                                                                                                                                                                                                                                                                                                                                                                                                                                                                                                                                                                                                                                                                                                                                                                                                            | 0      | 0.135831    | 0.130186  | -2.883272 |  |  |  |        |        |        |             |  |  |        |        |      |   |   |   |       |  |  |  |  |  |  |   |   |   |          |          |          |   |   |   |          |          |          |   |   |   |          |          |          |   |   |   |          |          |          |   |   |   |          |          |          |   |   |   |           |          |          |   |   |   |          |           |          |   |   |   |          |          |          |   |   |   |          |          |           |    |   |   |           |          |           |    |   |   |           |          |           |    |   |   |          |          |           |    |   |   |          |          |           |    |   |   |          |          |           |    |   |   |           |          |           |    |   |   |           |          |           |    |   |   |          |           |           |    |   |   |           |          |           |    |   |   |           |          |           |    |   |   |           |          |           |
| 13                                                                                                                                                                                                                                                                                                                                                                                                                                                                                                                                                                                                                                                                                                                                                                                                                           | 6                                                                                                                                                                                                                                                                                                                                                                                                                                                                                                                                                                                                                                                                                                                                                                                                                                                                                                                                                                                                                                                                                                                                                                                                                                                                                                                                                                                                                                                                                                                                                                                                                                                                                                                                                                                                                                                                                                                                                                                                                                                                                                                                                                                                                                                            | 0      | 1.276840    | 0.077602  | -2.074529 |  |  |  |        |        |        |             |  |  |        |        |      |   |   |   |       |  |  |  |  |  |  |   |   |   |          |          |          |   |   |   |          |          |          |   |   |   |          |          |          |   |   |   |          |          |          |   |   |   |          |          |          |   |   |   |           |          |          |   |   |   |          |           |          |   |   |   |          |          |          |   |   |   |          |          |           |    |   |   |           |          |           |    |   |   |           |          |           |    |   |   |          |          |           |    |   |   |          |          |           |    |   |   |          |          |           |    |   |   |           |          |           |    |   |   |           |          |           |    |   |   |          |           |           |    |   |   |           |          |           |    |   |   |           |          |           |    |   |   |           |          |           |
| 14                                                                                                                                                                                                                                                                                                                                                                                                                                                                                                                                                                                                                                                                                                                                                                                                                           | 6                                                                                                                                                                                                                                                                                                                                                                                                                                                                                                                                                                                                                                                                                                                                                                                                                                                                                                                                                                                                                                                                                                                                                                                                                                                                                                                                                                                                                                                                                                                                                                                                                                                                                                                                                                                                                                                                                                                                                                                                                                                                                                                                                                                                                                                            | 0      | 1.294077    | 0.102234  | -0.675321 |  |  |  |        |        |        |             |  |  |        |        |      |   |   |   |       |  |  |  |  |  |  |   |   |   |          |          |          |   |   |   |          |          |          |   |   |   |          |          |          |   |   |   |          |          |          |   |   |   |          |          |          |   |   |   |           |          |          |   |   |   |          |           |          |   |   |   |          |          |          |   |   |   |          |          |           |    |   |   |           |          |           |    |   |   |           |          |           |    |   |   |          |          |           |    |   |   |          |          |           |    |   |   |          |          |           |    |   |   |           |          |           |    |   |   |           |          |           |    |   |   |          |           |           |    |   |   |           |          |           |    |   |   |           |          |           |    |   |   |           |          |           |
| 15                                                                                                                                                                                                                                                                                                                                                                                                                                                                                                                                                                                                                                                                                                                                                                                                                           | 1                                                                                                                                                                                                                                                                                                                                                                                                                                                                                                                                                                                                                                                                                                                                                                                                                                                                                                                                                                                                                                                                                                                                                                                                                                                                                                                                                                                                                                                                                                                                                                                                                                                                                                                                                                                                                                                                                                                                                                                                                                                                                                                                                                                                                                                            | 0      | -2.100104   | 0.210237  | -0.301395 |  |  |  |        |        |        |             |  |  |        |        |      |   |   |   |       |  |  |  |  |  |  |   |   |   |          |          |          |   |   |   |          |          |          |   |   |   |          |          |          |   |   |   |          |          |          |   |   |   |          |          |          |   |   |   |           |          |          |   |   |   |          |           |          |   |   |   |          |          |          |   |   |   |          |          |           |    |   |   |           |          |           |    |   |   |           |          |           |    |   |   |          |          |           |    |   |   |          |          |           |    |   |   |          |          |           |    |   |   |           |          |           |    |   |   |           |          |           |    |   |   |          |           |           |    |   |   |           |          |           |    |   |   |           |          |           |    |   |   |           |          |           |
| 16                                                                                                                                                                                                                                                                                                                                                                                                                                                                                                                                                                                                                                                                                                                                                                                                                           | 6                                                                                                                                                                                                                                                                                                                                                                                                                                                                                                                                                                                                                                                                                                                                                                                                                                                                                                                                                                                                                                                                                                                                                                                                                                                                                                                                                                                                                                                                                                                                                                                                                                                                                                                                                                                                                                                                                                                                                                                                                                                                                                                                                                                                                                                            | 0      | -2.320379   | 0.055900  | -3.008483 |  |  |  |        |        |        |             |  |  |        |        |      |   |   |   |       |  |  |  |  |  |  |   |   |   |          |          |          |   |   |   |          |          |          |   |   |   |          |          |          |   |   |   |          |          |          |   |   |   |          |          |          |   |   |   |           |          |          |   |   |   |          |           |          |   |   |   |          |          |          |   |   |   |          |          |           |    |   |   |           |          |           |    |   |   |           |          |           |    |   |   |          |          |           |    |   |   |          |          |           |    |   |   |          |          |           |    |   |   |           |          |           |    |   |   |           |          |           |    |   |   |          |           |           |    |   |   |           |          |           |    |   |   |           |          |           |    |   |   |           |          |           |
| 17                                                                                                                                                                                                                                                                                                                                                                                                                                                                                                                                                                                                                                                                                                                                                                                                                           | 1                                                                                                                                                                                                                                                                                                                                                                                                                                                                                                                                                                                                                                                                                                                                                                                                                                                                                                                                                                                                                                                                                                                                                                                                                                                                                                                                                                                                                                                                                                                                                                                                                                                                                                                                                                                                                                                                                                                                                                                                                                                                                                                                                                                                                                                            | 0      | 2.227539    | -0.136192 | -2.575951 |  |  |  |        |        |        |             |  |  |        |        |      |   |   |   |       |  |  |  |  |  |  |   |   |   |          |          |          |   |   |   |          |          |          |   |   |   |          |          |          |   |   |   |          |          |          |   |   |   |          |          |          |   |   |   |           |          |          |   |   |   |          |           |          |   |   |   |          |          |          |   |   |   |          |          |           |    |   |   |           |          |           |    |   |   |           |          |           |    |   |   |          |          |           |    |   |   |          |          |           |    |   |   |          |          |           |    |   |   |           |          |           |    |   |   |           |          |           |    |   |   |          |           |           |    |   |   |           |          |           |    |   |   |           |          |           |    |   |   |           |          |           |
| 18                                                                                                                                                                                                                                                                                                                                                                                                                                                                                                                                                                                                                                                                                                                                                                                                                           | 6                                                                                                                                                                                                                                                                                                                                                                                                                                                                                                                                                                                                                                                                                                                                                                                                                                                                                                                                                                                                                                                                                                                                                                                                                                                                                                                                                                                                                                                                                                                                                                                                                                                                                                                                                                                                                                                                                                                                                                                                                                                                                                                                                                                                                                                            | 0      | -2.268431   | 0.082794  | -4.391159 |  |  |  |        |        |        |             |  |  |        |        |      |   |   |   |       |  |  |  |  |  |  |   |   |   |          |          |          |   |   |   |          |          |          |   |   |   |          |          |          |   |   |   |          |          |          |   |   |   |          |          |          |   |   |   |           |          |          |   |   |   |          |           |          |   |   |   |          |          |          |   |   |   |          |          |           |    |   |   |           |          |           |    |   |   |           |          |           |    |   |   |          |          |           |    |   |   |          |          |           |    |   |   |          |          |           |    |   |   |           |          |           |    |   |   |           |          |           |    |   |   |          |           |           |    |   |   |           |          |           |    |   |   |           |          |           |    |   |   |           |          |           |
| 19                                                                                                                                                                                                                                                                                                                                                                                                                                                                                                                                                                                                                                                                                                                                                                                                                           | 1                                                                                                                                                                                                                                                                                                                                                                                                                                                                                                                                                                                                                                                                                                                                                                                                                                                                                                                                                                                                                                                                                                                                                                                                                                                                                                                                                                                                                                                                                                                                                                                                                                                                                                                                                                                                                                                                                                                                                                                                                                                                                                                                                                                                                                                            | 0      | -3.284929   | 0.125257  | -2.506075 |  |  |  |        |        |        |             |  |  |        |        |      |   |   |   |       |  |  |  |  |  |  |   |   |   |          |          |          |   |   |   |          |          |          |   |   |   |          |          |          |   |   |   |          |          |          |   |   |   |          |          |          |   |   |   |           |          |          |   |   |   |          |           |          |   |   |   |          |          |          |   |   |   |          |          |           |    |   |   |           |          |           |    |   |   |           |          |           |    |   |   |          |          |           |    |   |   |          |          |           |    |   |   |          |          |           |    |   |   |           |          |           |    |   |   |           |          |           |    |   |   |          |           |           |    |   |   |           |          |           |    |   |   |           |          |           |    |   |   |           |          |           |
| 20                                                                                                                                                                                                                                                                                                                                                                                                                                                                                                                                                                                                                                                                                                                                                                                                                           | 1                                                                                                                                                                                                                                                                                                                                                                                                                                                                                                                                                                                                                                                                                                                                                                                                                                                                                                                                                                                                                                                                                                                                                                                                                                                                                                                                                                                                                                                                                                                                                                                                                                                                                                                                                                                                                                                                                                                                                                                                                                                                                                                                                                                                                                                            | 0      | -3.182973   | 0.066549  | -4.973383 |  |  |  |        |        |        |             |  |  |        |        |      |   |   |   |       |  |  |  |  |  |  |   |   |   |          |          |          |   |   |   |          |          |          |   |   |   |          |          |          |   |   |   |          |          |          |   |   |   |          |          |          |   |   |   |           |          |          |   |   |   |          |           |          |   |   |   |          |          |          |   |   |   |          |          |           |    |   |   |           |          |           |    |   |   |           |          |           |    |   |   |          |          |           |    |   |   |          |          |           |    |   |   |          |          |           |    |   |   |           |          |           |    |   |   |           |          |           |    |   |   |          |           |           |    |   |   |           |          |           |    |   |   |           |          |           |    |   |   |           |          |           |

|                                                                |                                     |
|----------------------------------------------------------------|-------------------------------------|
| Sum of electronic and thermal Free Energies= -538.717140       | 21 6 0 -1.026293 0.155257 -5.042054 |
| Vibronic calculations:                                         | 22 6 0 0.139669 0.147818 -4.299330  |
| Energy = 0.0000 cm <sup>-1</sup> :  0> ->  0>                  | 23 1 0 -0.985799 0.192018 -6.124858 |
| -> Intensity = 12.87 (DipStr = 0.1508E-04)                     | 24 1 0 1.101399 0.094134 -4.807979  |
|                                                                | -----                               |
| <b>C<sub>14</sub>H<sub>10</sub><sup>+</sup>: D<sub>0</sub></b> | -----                               |
| <b>(E<sub>rel</sub> = -11.71 eV)</b>                           | Center Atomic Atomic Coordinates    |
| Charge = 1 Multiplicity = 2                                    | Number Number Type X Y Z            |
| Low frequencies --- -0.0007 -0.0005 -                          | -----                               |
| 0.0004 2.6439 3.6320 5.4001                                    | 1 6 0 -0.014787 0.000000 0.023792   |
| Low frequencies --- 85.0196 118.9532                           | 2 6 0 0.013443 0.000000 1.433706    |
| 218.2596                                                       | 3 6 0 1.221353 0.000000 2.113019    |
| Zero-point correction=                                         | 4 6 0 2.432193 0.000000 1.408404    |
| 0.193669 (Hartree/Particle)                                    | 5 6 0 2.438361 0.000000 0.022593    |
| Thermal correction to Energy=                                  | 6 1 0 -0.920008 0.000000 1.983919   |
| 0.203240                                                       | 7 1 0 1.229921 0.000000 3.195614    |
| Thermal correction to Enthalpy=                                | 8 1 0 3.369197 0.000000 1.950723    |
| 0.204184                                                       | 9 1 0 3.377913 0.000000 -0.517136   |
| Thermal correction to Gibbs Free Energy=                       | 10 6 0 -1.223201 0.000000 -0.694081 |
| 0.158068                                                       | 11 6 0 -1.250306 0.000000 -2.099382 |
| Sum of electronic and zero-point Energies=                     | 12 6 0 -0.009028 0.000000 -2.821708 |
| -539.222021                                                    | 13 6 0 1.199385 0.000000 -2.103837  |
| Sum of electronic and thermal Energies=                        | 14 6 0 1.226492 0.000000 -0.698534  |
| -539.212450                                                    | 15 1 0 -2.160765 0.000000 -0.148490 |
| Sum of electronic and thermal Enthalpies=                      | 16 6 0 -2.462177 0.000000 -2.820509 |
| -539.211506                                                    | 17 1 0 2.136951 0.000000 -2.649424  |
| Sum of electronic and thermal Free Energies=                   | 18 6 0 -2.456009 0.000000 -4.206320 |
| -539.257622                                                    | 19 1 0 -3.401728 0.000000 -2.280780 |
|                                                                | 20 1 0 -3.393013 0.000000 -4.748639 |
|                                                                | 21 6 0 -1.245169 0.000000 -4.910936 |
|                                                                | 22 6 0 -0.037259 0.000000 -4.231625 |
|                                                                | 23 1 0 -1.253739 0.000000 -5.993532 |
|                                                                | 24 1 0 0.896192 0.000000 -4.781836  |
|                                                                | -----                               |
